# Supplementary material for: Palladium pincer complexes featuring an unsymmetrical SCN indene-based ligand with a hemilabile pyridine sidearm
Source: Royal Society of Chemistry journal article supplement (doi:10.1039/c9dt00898e), 2019-01-01

# Palladium pincer complexes featuring an unsymmetrical SCN indene-based ligand with an hemilabile pyridine sidearm

Paul Brunel,<sup>a</sup> Chloé Lhardy,<sup>a</sup> Sonia Mallet-Ladeira,<sup>b</sup> Julien Monot,<sup>\*a</sup> Blanca Martin-Vaca<sup>\*a</sup>  
and Didier Bourissou<sup>\*a</sup>

<sup>a</sup>CNRS, Université Paul Sabatier, Laboratoire Hétérochimie Fondamentale et Appliquée (LHFA, UMR 5069), 118 Route de Narbonne, 31062 Toulouse Cedex 09, France.

<sup>b</sup>Université de Toulouse, UPS, Institut de Chimie de Toulouse, FR2599, 118 Route de Narbonne, F-31062 Toulouse, France.

Email: [monot@chimie.ups-tlse.fr](mailto:monot@chimie.ups-tlse.fr); [bmv@chimie.ups-tlse.fr](mailto:bmv@chimie.ups-tlse.fr) and [dbouriss@chimie.ups-tlse.fr](mailto:dbouriss@chimie.ups-tlse.fr)

## Table of contents

|       |                                                                                              |     |
|-------|----------------------------------------------------------------------------------------------|-----|
| I.    | General remarks.....                                                                         | S2  |
| II.   | Synthesis of compound 2 to 4: .....                                                          | S2  |
| III.  | Lability test in presence of triphenylphosphine.....                                         | S6  |
| IV.   | Lability test in presence of 2,6-dimethylisocyanide.....                                     | S7  |
| V.    | Hemilability test in presence of TFA and DIEA .....                                          | S8  |
| VI.   | <i>In situ</i> infrared experiments using reactIR 15 Metler Toledo Optic silicium fiber..... | S9  |
| VII.  | General procedure for catalytic cycloisomerization reactions .....                           | S10 |
| VIII. | Selected crystal data .....                                                                  | S10 |
| IX.   | NMR Spectra.....                                                                             | S12 |

## I. General remarks

All reactions and manipulations were carried out under argon atmosphere using standard Schlenk techniques. Dry oxygen-free solvents were employed using an Mbraun SPS-800 prior to use. All reagents were obtained from commercial sources. Compound **1** was synthesized following the literature procedures.<sup>1</sup> <sup>1</sup>H and <sup>13</sup>C spectra were recorded on Bruker Avance 300, 400 and 500 spectrometers. Chemical shifts are expressed with a positive sign, in parts per million, relative to external Me<sub>4</sub>Si for <sup>1</sup>H NMR and to external H<sub>3</sub>PO<sub>4</sub> for <sup>31</sup>P NMR. NMR spectra were recorded at 293 K.

## II. Synthesis of compound 2 to 4:

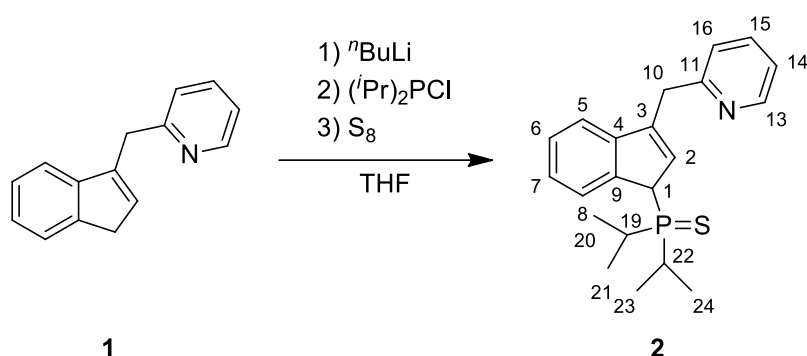

**Synthesis of pro ligand 2:** In a 250 mL round-bottomed schlenk, *n*-BuLi (11.2 mL of a 1.6 M hexane solution, 0.018 mol) was added dropwise at -80°C to a solution of **1** (3.7 g, 0.018 mol) in THF (100 mL). The solution was stirred at -80°C for 30 min and then allowed to warm to room temperature and stirred for 30 min. Then, a solution of chlorodiisopropylphosphine (2.9 mL, 0.018 mol in 10 mL of THF) was added dropwise at -80°C. The reaction mixture was stirred at this temperature for 30 min and then allowed to warm to room temperature overnight. Finally, the crude was transferred *via* canula in a 250 mL round-bottomed schlenk containing elemental sulfur (1.10 g, 0.036 mmol). The reaction mixture was stirred for 2h. After the addition of 100 mL of a saturated solution of NaHCO<sub>3</sub> the organic products were extracted 3 times with 50 mL of DCM. The combined organic phases were then washed with water and dried over Na<sub>2</sub>SO<sub>4</sub> and evaporated. The residue was purified by silica gel flash chromatography. The impurities were first eluted with 100% pentane and then 80:20 pentane/EtOAc. Finally, the product **2** was eluted with a gradient from 60:40 pentane/EtOAc to 100% EtOAc to afford a highly viscous brown oil in 76% yield (4.7 g).

<sup>1</sup> V. Vreshch, J. Monot, B. Martin-Vaca and D. Bourissou, *Polyhedron*, 2018, **143**, 49.

**$^{31}\text{P}\{^1\text{H}\}$ -NMR** (121 MHz,  $\text{CDCl}_3$ ):  $\delta$  ppm 70.2 (s).  **$^1\text{H}$ -NMR** (300 MHz,  $\text{CDCl}_3$ ):  $\delta$  ppm 8.55 (m, 1H, H13), 8.07 (m, 1H, H8), 7.60 (m, 1H, H14), 7.37 (m, 1H, H5), 7.32 (m, 1H, H7), 7.24 (m, 1H, H6), 7.21 (m, 1H, H16), 7.15 (m, 1H, H15), 6.36 (m, 1H, H2), 4.26 (dd,  $^3J_{\text{HH}} = 1.8$  Hz,  $^2J_{\text{HP}} = 23.4$  Hz, 1H, H1), 4.11 (m, 2H, H10), 2.22 (m, 1H, H22), 2.03 (m, 1H, H19), 1.19 (dd,  $^3J_{\text{HH}} = 7.0$  Hz,  $^3J_{\text{HP}} = 16.8$  Hz, 3H, H24), 1.07 (dd,  $^3J_{\text{HH}} = 7.0$  Hz,  $^3J_{\text{HP}} = 16.8$  Hz, 3H, H23), 1.03 (dd,  $^3J_{\text{HH}} = 7.0$  Hz,  $^3J_{\text{HP}} = 16.8$  Hz, 3H, H21), 0.90 (dd,  $^3J_{\text{HH}} = 7.0$  Hz,  $^3J_{\text{HP}} = 16.8$  Hz, 3H, H20);  **$^{13}\text{C}\{^1\text{H}\}$ -NMR** (75 MHz,  $\text{CDCl}_3$ ):  $\delta$  ppm 158.6 (d,  $^5J_{\text{CP}} = 1.8$  Hz, C11), 149.5 (s, C13), 144.5 (d,  $^2J_{\text{CP}} = 3.3$  Hz, C9), 143.8 (d,  $^3J_{\text{CP}} = 8.5$  Hz, C3), 141.0 (d,  $^3J_{\text{CP}} = 3.5$  Hz, C4), 136.5 (s, C14), 128.1 (d,  $^2J_{\text{CP}} = 4.9$  Hz, C2), 127.4 (s, C7), 125.5 (d,  $^3J_{\text{CP}} = 3.3$  Hz, C8), 125.4 (d,  $^5J_{\text{CP}} = 2.9$  Hz, C6), 123.1 (s, C16), 121.6 (s, C15), 120.2 (s, C5), 51.5 (d,  $^1J_{\text{CP}} = 38.0$  Hz, C1), 37.3 (d,  $^4J_{\text{CP}} = 1.4$  Hz, C10), 28.0 (d,  $^1J_{\text{CP}} = 30.8$  Hz, C22), 27.4 (d,  $^1J_{\text{CP}} = 29.8$  Hz, C19) 17.5 (d,  $^2J_{\text{CP}} = 2.6$  Hz, C21), 17.3 (d,  $^2J_{\text{CP}} = 2.6$  Hz, C24), 16.9 (d,  $^2J_{\text{CP}} = 2.4$  Hz, C23), 16.7 (d,  $^2J_{\text{CP}} = 2.3$  Hz, C20). **HRMS** (ESI):  $m/z$   $[\text{M}+\text{H}]^+$  Calcd: 356.1596, Found: 356.1602.

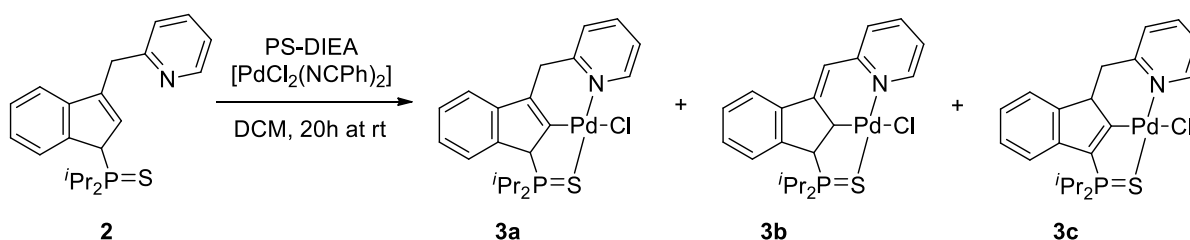

**Synthesis of  $\{\text{PdCl}[(^i\text{Pr}_2\text{P}=\text{S})(\text{CH}_2\text{Pyr})(\text{C}_9\text{H}_5)]\}$  (**3**):** A solution of **2** in DCM (248.8 mg, 0.7 mmol in 1 mL) was added to a solution of PS-DIEA (233.3 mg at 3 mmol/g) and  $[\text{PdCl}_2(\text{NCPh})_2]$  (268.5 mg, 0.7 mmol) in DCM (9 mL) at room temperature. The reaction mixture was stirred at room temperature for 20 hours and, then filtered over a celite pad. The products were extracted 3 times with 2 mL of DCM. The combined organic phases were evaporated and the residue was purified by silica gel flash chromatography. The products **3** were eluted with 100% DCM to afford 78.1 mg of a pale reddish powder, 103.9 mg of a yellowish powder and 84 mg of an orange powder, respectively for **3c**, **3a** and **3b** (overall yield = 77 %).

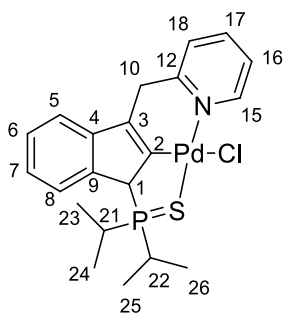

**3a**

**Mp** = 191.6°C (decomp.);  **$^{31}\text{P}\{^1\text{H}\}$ -NMR** (121 MHz,  $\text{CDCl}_3$ ):  $\delta$  ppm 81.9 (s);  **$^1\text{H}$ -NMR** (500 MHz,  $\text{CDCl}_3$ ):  $\delta$  ppm 9.70 (dd,  $^3J_{\text{HH}} = 5.8$  Hz,  $^4J_{\text{HH}} = 1.3$  Hz, 1H, H15), 7.75 (ddd,  $^3J_{\text{HH}} = 7.7$  Hz,  $^3J_{\text{HH}} = 7.7$  Hz,  $^4J_{\text{HH}} = 1.3$  Hz, 1H, H17), 7.45 (d,  $^3J_{\text{HH}} = 7.7$  Hz, 1H, H18), 7.37 (m, 1H, H8) 7.36 (m, 2H, H<sub>AroInd</sub>), 7.25 (brdd,  $^3J_{\text{HH}} = 7.7$  Hz,  $^3J_{\text{HH}} = 5.8$  Hz, 1H, H16), 7.11 (m, H<sub>AroInd</sub>), 4.78 (dd,  $^2J_{\text{HP}} = 20.6$  Hz,  $J_{\text{HH}} = 2.8$  Hz, 1H, H1), 4.12 (brs, 2H, H10), 2.78 (m, 1H, H22), 1.83 (m, 1H, H21), 1.63 (dd,  $^3J_{\text{HP}} = 17.6$  Hz,

$^3J_{\text{HH}} = 7.1$  Hz, 3H, H26), 1.49 (dd,  $^3J_{\text{HP}} = 17.4$  Hz,  $^3J_{\text{HH}} = 7.0$  Hz, 3H, H25), 0.97 (dd,  $^3J_{\text{HP}} = 17.8$  Hz,  $^3J_{\text{HH}} = 7.2$  Hz, 6H, H24 and H23);  **$^{13}\text{C}\{^1\text{H}\}$ -NMR** (126 MHz,  $\text{CDCl}_3$ ):  $\delta$  ppm 156.70 (d,  $^5J_{\text{CP}} = 1.0$  Hz, C12), 154.96 (s, C15), 153.78 (d,  $^2J_{\text{CP}} = 1.2$  Hz, C2), 145.72 (d,  $^3J_{\text{CP}} = 3.6$  Hz, C4), 140.55 (d,  $^2J_{\text{CP}} = 1.9$  Hz, C9), 138.08 (s, C18), 133.35 (d,  $^3J_{\text{CP}} = 8.3$  Hz, C3), 128.15 (d,  $J_{\text{CP}} = 1.5$  Hz, C<sub>AroInd</sub>), 125.13 (s, C17), 123.53 (d,  $J_{\text{CP}} = 2.0$  Hz, C8), 123.19 (d,  $J_{\text{CP}} = 1.6$  Hz, C<sub>AroInd</sub>), 122.81 (s, C16), 117.90 (s, C6), 63.88 (d,  $^1J_{\text{CP}} = 45.8$  Hz, C1), 37.60 (d,  $^4J_{\text{CP}} = 0.9$  Hz, C10), 25.49 (d,  $^1J_{\text{CP}} = 41.5$  Hz, C21), 24.69 (d,  $^1J_{\text{CP}} = 39.6$  Hz, C22), 17.66 (d,  $^2J_{\text{CP}} = 2.5$  Hz, C26), 17.43 (d,  $^2J_{\text{CP}} = 3.0$  Hz, C24), 17.37 (d,  $^2J_{\text{CP}} = 2.7$  Hz, C25), 16.95 (d,  $^2J_{\text{CP}} = 2.7$  Hz, C23). **HRMS** (ESI):  $m/z$   $[\text{M}-\text{Cl}]^+$  Calcd: 460.0480, Found: 460.0481. **Elemental Anal** Calcd for  $\text{C}_{21}\text{H}_{25}\text{ClINPPdS}$ : C, 50.82; H, 5.08; N, 2.82. Found: C, 51.05; H, 5.35; N, 2.58.

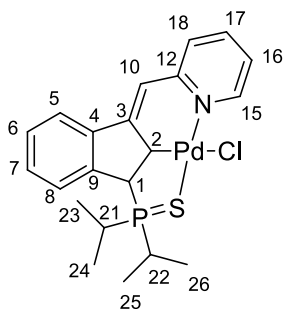

**3b**

**Mp** = 265.4°C (decomp.);  **$^{31}\text{P}\{^1\text{H}\}$ -NMR** (121 MHz,  $\text{CDCl}_3$ ):  $\delta$  ppm 82.5 (s);  **$^1\text{H}$ -NMR** (500 MHz,  $\text{CDCl}_3$ ):  $\delta$  ppm 9.61 (d,  $^3J_{\text{HH}} = 5.6$  Hz, 1H, H15), 7.69 (d,  $^3J_{\text{HH}} = 7.6$  Hz, 1H, H8), 7.66 (dd,  $^3J_{\text{HH}} = 7.7$  Hz,  $^4J_{\text{HH}} = 7.7$  Hz, 1H, H18), 7.39 (dd,  $^3J_{\text{HH}} = 7.6$  Hz,  $^4J_{\text{HH}} = 7.6$  Hz, 1H, H6), 7.34 (dd,  $^3J_{\text{HH}} = 7.6$  Hz,  $^4J_{\text{HH}} = 7.6$  Hz, 1H, H7), 7.27 (d,  $^3J_{\text{HH}} = 7.7$  Hz, 1H, H17), 7.24 (d,  $^3J_{\text{HH}} = 7.6$  Hz, 1H, H5), 7.17 (dd,  $^3J_{\text{HH}} = 5.6$  Hz,  $^4J_{\text{HH}} = 7.6$  Hz, 1H, H16), 6.94 (brs, 1H, H10), 5.12 (pseudo t,  $^3J_{\text{HP}} = 11.3$  Hz,  $^3J_{\text{HH}} = 11.3$  Hz, 1H, H2), 4.63

(dd,  $^2J_{\text{HP}} = 10.0$  Hz,  $^3J_{\text{HH}} = 11.3$  Hz, 1H, H1), 2.50 (m, 1H, H22), 2.47 (m, 1H, H21), 1.56 (dd,  $^3J_{\text{HP}} = 16.2$  Hz,  $^3J_{\text{HH}} = 7.1$  Hz, 3H, H24), 1.39 (dd,  $^3J_{\text{HP}} = 17.6$  Hz,  $^3J_{\text{HH}} = 7.4$  Hz, 3H, H26), 1.33 (dd,  $^3J_{\text{HP}} = 16.5$  Hz,  $^3J_{\text{HH}} = 7.0$  Hz, 3H, H23), 0.84 (dd,  $^3J_{\text{HP}} = 16.9$  Hz,  $^3J_{\text{HH}} = 7.1$  Hz, 3H, H25);  **$^{13}\text{C}\{^1\text{H}\}$ -NMR** (126 MHz,  $\text{CDCl}_3$ ):  $\delta$  ppm 154.46 (s, C15), 154.35 (s, C9), 152.77 (s, C12), 141.76 (d,  $^3J_{\text{CP}} = 4.2$  Hz, C4), 141.33 (d,  $^2J_{\text{CP}} = 5.4$  Hz, C3), 137.83 (s, C18), 129.73 (d,  $^4J_{\text{CP}} = 3.1$  Hz, C7), 128.68 (d,  $^5J_{\text{CP}} = 3.0$  Hz, C6), 124.54 (d,  $^4J_{\text{CP}} = 3.4$  Hz, C5), 122.56 (s, C17), 122.39 (s, C16), 122.13 (d,  $^3J_{\text{CP}} = 2.4$  Hz, C8), 115.48 (d,  $^4J_{\text{CP}} = 1.8$  Hz, C10), 53.56 (d,  $^1J_{\text{CP}} = 54.0$  Hz, C1), 37.05 (d,  $^2J_{\text{CP}} = 2.0$  Hz, C2),

28.02 (d,  $^1J_{CP}$  = 42.6 Hz, C22), 25.76 (d,  $^1J_{CP}$  = 32.7 Hz, C21), 19.00 (d,  $^2J_{CP}$  = 2.9 Hz, C26), 17.23 (d,  $^2J_{CP}$  = 2.0 Hz, C24), 16.55 (d,  $^2J_{CP}$  = 2.0 Hz, C25), 16.11 (d,  $^2J_{CP}$  = 2.2 Hz, C23). **Elemental Anal** Calcd for C<sub>21</sub>H<sub>25</sub>ClNPPdS: C, 50.82; H, 5.08; N, 2.82. Found: C, 51.41; H, 5.38; N, 2.65.

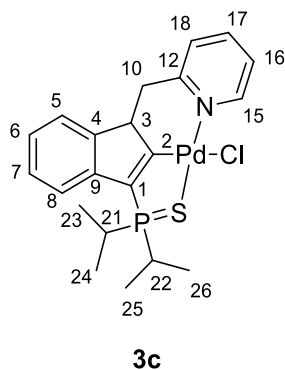

**Mp** = 201.2°C (decomp.);  $^{31}\text{P}\{^1\text{H}\}$ -NMR (121 MHz, CDCl<sub>3</sub>):  $\delta$  ppm 81.9 (s);  $^1\text{H}$ -NMR (500 MHz, CDCl<sub>3</sub>):  $\delta$  ppm 9.93 (dd,  $^3J_{HH}$  = 5.8 Hz,  $^4J_{HH}$  = 1.2 Hz, 1H, H15), 7.85 (ddd,  $^3J_{HH}$  = 7.6 Hz,  $J_{HH}$  = 7.6 Hz,  $^4J_{HH}$  = 1.6 Hz, 1H, H18), 7.49 (d,  $^3J_{HH}$  = 7.6 Hz, 2H, H8 and H17), 7.33 (m, 1H, H16), 7.27 (dd,  $^3J_{HH}$  = 7.4 Hz,  $^3J_{HH}$  = 7.4 Hz, 1H, H7), 7.18 (ddd,  $^3J_{HH}$  = 7.4 Hz,  $^3J_{HH}$  = 7.4 Hz,  $^4J_{HH}$  = 0.8 Hz, 1H, H6), 7.16 (brd,  $^3J_{HH}$  = 7.4 Hz, 1H, H5), 3.46 (dd,  $^2J_{HH}$  = 14.0 Hz,  $^3J_{HH}$  = 2.6 Hz, 1H, H10), 3.28 (dt,  $^3J_{HH}$  = 14.0 Hz,  $^3J_{HH}$  = 2.6 Hz, 1H, H3), 2.74 (dd,  $^2J_{HH}$  = 14.0 Hz,  $^3J_{HH}$  = 14.0 Hz, 1H, H10) 2.71 (m, 1H, H22), 2.60 (m, 1H, H21), 1.46 – 1.27 (12H, H26, H25, H24 and H23);  $^{13}\text{C}\{^1\text{H}\}$ -NMR (126 MHz, CDCl<sub>3</sub>):  $\delta$  ppm 191.57 (d,  $J_{CP}$  = 18.6 Hz, C2), 158.87 (s, C12), 155.10 (s, C15), 143.49 (d,  $J_{CP}$  = 9.3 Hz, C4), 143.07 (d,  $J_{CP}$  = 17.9 Hz, C9), 138.50 (s, C18), 135.50 (d,  $J_{CP}$  = 92.0 Hz, C1), 127.38 (s, C7), 125.60 (s, C17), 124.01 (s, C6), 123.34 (s, C8), 122.86 (s, C16), 117.99 (d,  $J_{CP}$  = 1.0 Hz, C5), 52.64 (d,  $J_{CP}$  = 15.3 Hz, C3), 39.45 (d,  $J_{CP}$  = 0.7 Hz, C10), 27.37 (d,  $^2J_{CP}$  = 44.9 Hz, C21), 26.06 (d,  $^2J_{CP}$  = 44.5 Hz, C22), 17.45 (d,  $^3J_{CP}$  = 1.9 Hz, H<sub>3</sub>C<sub>iPr</sub>), 16.95 (d,  $^3J_{CP}$  = 2.1 Hz, H<sub>3</sub>C<sub>iPr</sub>), 16.23 (d,  $^3J_{CP}$  = 2.1 Hz, H<sub>3</sub>C<sub>iPr</sub>), 16.03 (d,  $^3J_{CP}$  = 2.1 Hz, H<sub>3</sub>C<sub>iPr</sub>). **HRMS** (ESI): m/z [M-Cl]<sup>+</sup> Calcd: 460.0480, Found: 460.0470.

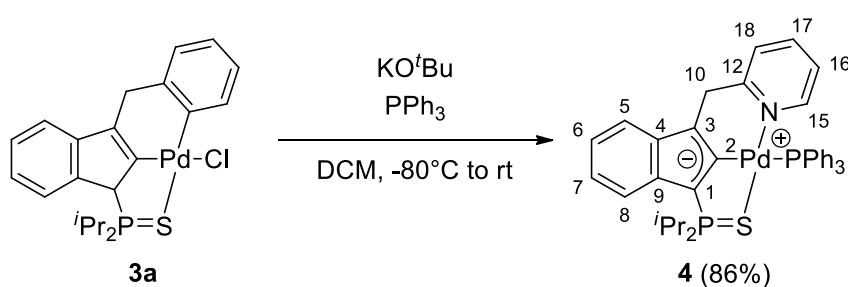

**Synthesis of {PdPPh<sub>3</sub>[(<sup>i</sup>Pr<sub>2</sub>P=S)(CH<sub>2</sub>Pyr)(C<sub>9</sub>H<sub>4</sub>)]} (4):** In a schlenk, potassium tert-butoxide (9 mg, 0.08 mmol) and triphenylphosphine (21 mg, 0.08 mmol) were added at -80°C to a solution of **3a** (40 mg, 0.08 mmol) in DCM (4 mL). Then the reaction mixture was allowed to warm to room temperature overnight under stirring. The mixture was filtered *via* canula and the product was extracted two times with 2 mL of DCM and precipitated with pentane. After drying under vacuum, **4** was obtained as a dark red powder in 86% yield (50 mg).

**$^{31}\text{P}\{^1\text{H}\}$ -NMR** (121 MHz,  $\text{C}_6\text{D}_6$ ):  $\delta$  ppm 76.6 (d,  $^3J_{\text{PP}} = 45.5$  Hz), 17.8 (d,  $^3J_{\text{PP}} = 45.5$  Hz);  **$^1\text{H}$ -NMR** (500 MHz,  $\text{C}_6\text{D}_6$ ):  $\delta$  ppm 8.16 (d,  $^3J_{\text{HH}} = 5.5$  Hz, 1H, H15), 7.93 (d,  $J_{\text{HH}} = 7.5$  Hz, 1H, H<sub>AroInd</sub>), 7.70 (m, 6H, H<sub>ortho-PPh3</sub>), 7.60 (d,  $J_{\text{HH}} = 7.7$  Hz, 1H, H<sub>AroInd</sub>), 7.42 (m, 1H, H<sub>AroInd</sub>), 7.35 (m, 1H, H<sub>AroInd</sub>), 6.99-6.97 (m, 9H, H<sub>para-PPh3</sub> and H<sub>meta-PPh3</sub>), 6.53 (m, 1H, H18), 6.52 (m, 1H, H17), 5.71 (m, 1H, H16), 4.40 (s, 2H, H10), 2.44 (m, 2H, CH<sub>iPr</sub>), 1.27 (dd,  $^3J_{\text{HP}} = 16.6$  Hz,  $^3J_{\text{HH}} = 7.0$  Hz, 3H, H<sub>3C<sub>iPr</sub></sub>), 1.11 (dd,  $^3J_{\text{HP}} = 17.6$  Hz,  $^3J_{\text{HH}} = 7.0$  Hz, 3H, H<sub>3C<sub>iPr</sub></sub>);  **$^{13}\text{C}\{^1\text{H}\}$ -NMR** (126 MHz,  $\text{C}_6\text{D}_6$ ):  $\delta$  ppm 163.25 (dd,  $J_{\text{CP}} = 103.9$  Hz,  $J_{\text{CP}} = 24.5$  Hz, C2), 163.06 (s, C12), 153.92 (d,  $^3J_{\text{CP}} = 10.3$  Hz, C15), 136.68 (s, C17), 134.85 (dd,  $^2J_{\text{CP}} = 18.4$  Hz,  $^4J_{\text{CP}} = 5.0$  Hz, C9), 134.55 (d,  $^2J_{\text{CP}} = 13.3$  Hz, C<sub>o-PPh3</sub>), 132.66 (d,  $^1J_{\text{CP}} = 28.4$  Hz, C<sub>i-PPh3</sub>), 132.26 (dd,  $^3J_{\text{CP}} = 11.8$  Hz,  $^4J_{\text{CP}} = 10.1$  Hz, C4), 129.87 (s, C<sub>p-PPh3</sub>), 128.41 (d,  $^3J_{\text{CP}} = 9.1$  Hz, C<sub>m-PPh3</sub>), 124.67 (s, C18), 120.10 (s, C16), 116.07 (s, C<sub>AroInd</sub>), 116.06 (s, C<sub>AroInd</sub>), 115.35 (s, C<sub>AroInd</sub>), 102.71 (dd,  $^3J_{\text{CP}} = 15.1$  Hz,  $^3J_{\text{CP}} = 2.7$  Hz, C3), 83.87 (dd,  $^1J_{\text{CP}} = 118.6$  Hz,  $^3J_{\text{CP}} = 4.5$  Hz, C1), 38.63 (s, C10), 26.63 (d,  $^1J_{\text{CP}} = 47.1$  Hz, CH<sub>iPr</sub>), 16.73 (s, H<sub>3C<sub>iPr</sub></sub>), 16.36 (d,  $^2J_{\text{CP}} = 2.1$  Hz, H<sub>3C<sub>iPr</sub></sub>).

### III. Lability test in presence of triphenylphosphine.

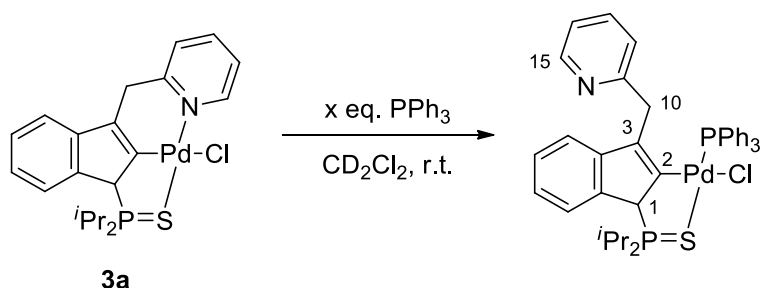

In a NMR pressure tube, triphenylphosphine (5 mg, 0.02 mmol) was added to a solution of **3a** (10 mg, 0.020 mmol) in  $\text{CD}_2\text{Cl}_2$  (0.4 mL) under argon atmosphere. Then, subsequent additions of increasing amounts of  $\text{PPh}_3$  (up to 250 mg, 1.0 mmol) were monitored by  $^1\text{H}$  and  $^{31}\text{P}$  NMR.

#### IV. Lability test in presence of 2,6-dimethylisonitrile

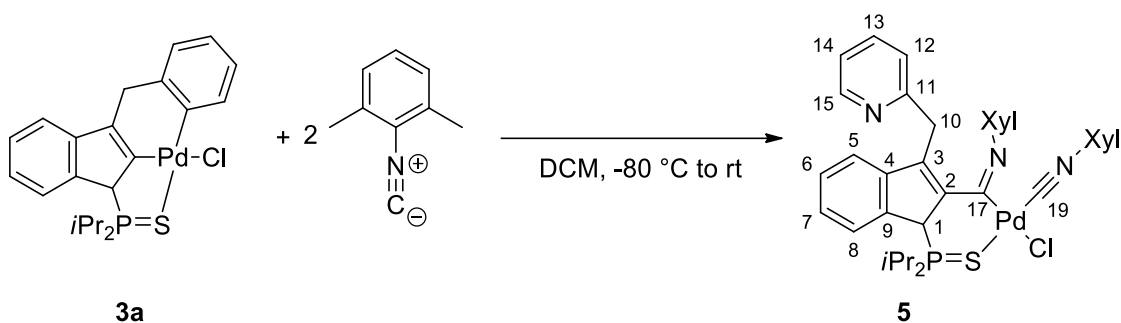

In a schlenk, a solution of 2,6-dimethyl isonitrile (5.2 mg, 0.04 mmol) in DCM (1 mL) was added dropwise to a solution of **3a** (10 mg, 0.02 mmol) in DCM (4 mL) cooled down at  $-80^\circ\text{C}$ . Then the reaction mixture was allowed to warm slowly to room temperature overnight. The reaction crude was directly analysed by NMR spectroscopy to characterize **5** as the major product. Suitable crystals of **5** were grown by slow diffusion of pentane in a saturated solution in DCM at room temperature.

**$^{31}\text{P}\{^1\text{H}\}$ -NMR** (162 MHz,  $\text{CD}_2\text{Cl}_2$ , 213.15 K):  $\delta$  ppm 71.81 (s);  **$^1\text{H}$ -NMR** (400 MHz,  $\text{CD}_2\text{Cl}_2$ , 213.15 K):  $\delta$  ppm 8.42 (d,  $^3J_{\text{HH}} = 3.7$  Hz, 1H, H15), 7.77 (d,  $J_{\text{HH}} = 7.6$  Hz, 1H, H<sub>Ind(ar)</sub>), 7.63 (d,  $J_{\text{HH}} = 7.6$  Hz, 1H, H<sub>Ind(ar)</sub>), 7.52 (m, 1H, H<sub>Pyr</sub>), 7.48 (m, 1H, H<sub>Ind(ar)</sub>), 7.42 (d,  $J_{\text{HH}} = 7.5$  Hz, 1H H), 7.41 (d,  $J_{\text{HH}} = 7.5$  Hz, 1H, H<sub>Ind(ar)</sub>), 7.40 (d,  $J_{\text{HH}} = 7.3$  Hz, 1H, H<sub>Pyr</sub>), 7.23 (m, 1H, H<sub>Xyl(ar)</sub>), 7.21 (m, 1H, H<sub>Xyl(ar)</sub>), 7.10 (m, 1H, H<sub>Pyr</sub>), 7.09 (m, 1H, H<sub>Xyl(ar)</sub>), 6.94 (t,  $J_{\text{HH}} = 7.5$  Hz, H<sub>Xyl(ar)</sub>), 6.64 (d,  $J_{\text{HH}} = 7.5$  Hz, 1H, H<sub>Xyl(ar)</sub>), 5.81 (d,  $^2J_{\text{HP}} = 21.3$  Hz, 1H, H1), 5.04 (d,  $^2J_{\text{HH}} = 13.8$  Hz, 1H, H10), 4.69 (d,  $^2J_{\text{HH}} = 13.8$  Hz, 1H, H10), 3.01 (m, 1H, CH<sub>iPr</sub>), 2.46 (s, 3H, H<sub>3C<sub>Xyl</sub></sub>), 2.12 (s, 6H, H<sub>3C<sub>Xyl</sub></sub>), 1.94 (m, 1H, CH<sub>iPr</sub>), 1.83 (m, 3H, H<sub>3C<sub>iPr</sub></sub>), 1.76 (s, 3H, H<sub>3C<sub>Xyl</sub></sub>), 1.35 (m, 3H, H<sub>3C<sub>iPr</sub></sub>), 0.79 (m, 3H, H<sub>3C<sub>iPr</sub></sub>), 0.50 (m, 3H, H<sub>3C<sub>iPr</sub></sub>);  **$^{13}\text{C}\{^1\text{H}\}$ -NMR** (101 MHz,  $\text{CD}_2\text{Cl}_2$ , 213.15 K):  $\delta$  ppm 191.88 (d,  $J_{\text{CP}} = 18.3$  Hz, C17), 171.22 (s, C19), 158.96 (s, C11), 151.31 (s, C<sup>IV</sup><sub>Xyl</sub>), 149.06 (s, C<sub>Pyr</sub>), 146.77 (s, C4 or C9), 142.68 (d,  $^2J_{\text{CP}} = 7.7$  Hz, C2), 138.00 (s, C4 or C9), 137.54 (d,  $^3J_{\text{CP}} = 6.4$  Hz, C3), 136.35 (s, C<sub>Pyr</sub>), 135.45 (s, C<sup>IV</sup><sub>Xyl</sub>), 129.59 (s, C<sub>Xyl</sub>), 129.10 (s, C<sup>III</sup><sub>Ind</sub>), 128.40 (s, C<sup>III</sup><sub>Xyl</sub>), 127.91 (s, C<sup>III</sup><sub>Xyl</sub>), 127.39 (s, C<sup>III</sup><sub>Xyl</sub>), 127.23 (s, C<sup>III</sup><sub>Ind</sub>), 127.04 (s, C<sup>IV</sup><sub>Xyl</sub>), 125.82 (s, C<sup>IV</sup><sub>Xyl</sub>), 125.44 (s, C<sup>IV</sup><sub>Xyl</sub>), 124.05 (s, C<sup>III</sup><sub>Ind</sub>), 123.97 (s, C<sup>III</sup><sub>Ind</sub>), 123.51 (s, C<sub>Pyr</sub>), 123.19 (s, C<sup>III</sup><sub>Xyl</sub>), 121.61 (s, C<sub>Pyr</sub>), 57.38 (d,  $^1J_{\text{CP}} = 35.6$  Hz, C1), 35.24 (s, C10), 27.36 (d,  $^1J_{\text{CP}} = 47.7$  Hz, CH<sub>iPr</sub>), 24.68 (d,  $^1J_{\text{CP}} = 47.7$  Hz, CH<sub>iPr</sub>), 20.19 (s, H<sub>3C<sub>Xyl</sub></sub>), 18.87 (s, H<sub>3C<sub>Xyl</sub></sub>), 18.85 (s, H<sub>3C<sub>Xyl</sub></sub>), 17.86 (s, H<sub>3C<sub>iPr</sub></sub>), 16.73 (s, H<sub>3C<sub>iPr</sub></sub>), 16.65 (s, H<sub>3C<sub>iPr</sub></sub>), 15.99 (s, H<sub>3C<sub>iPr</sub></sub>).

## V. Test in presence of TFA and DIEA

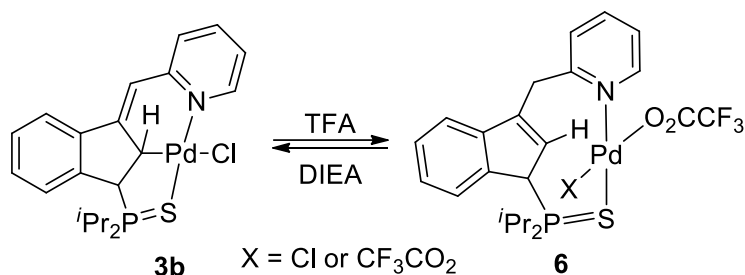

In a J. Young NMR tube, trifluoroacetic acid (4.6  $\mu\text{L}$ , 0.060 mmol) was added to a solution of complex **3b** (10 mg, 0.020 mmol) in  $\text{CD}_2\text{Cl}_2$  (0.5 mL) under argon at room temperature. The reaction was monitored by  $^1\text{H}$  and  $^{31}\text{P}$  NMR and revealed the clean formation of **6**. Then, N,N-Diisopropylethylamine was added (10.4  $\mu\text{L}$ , 0.060 mmol) and **3b** was recovered according to the  $^1\text{H}$  and  $^{31}\text{P}$  NMR.

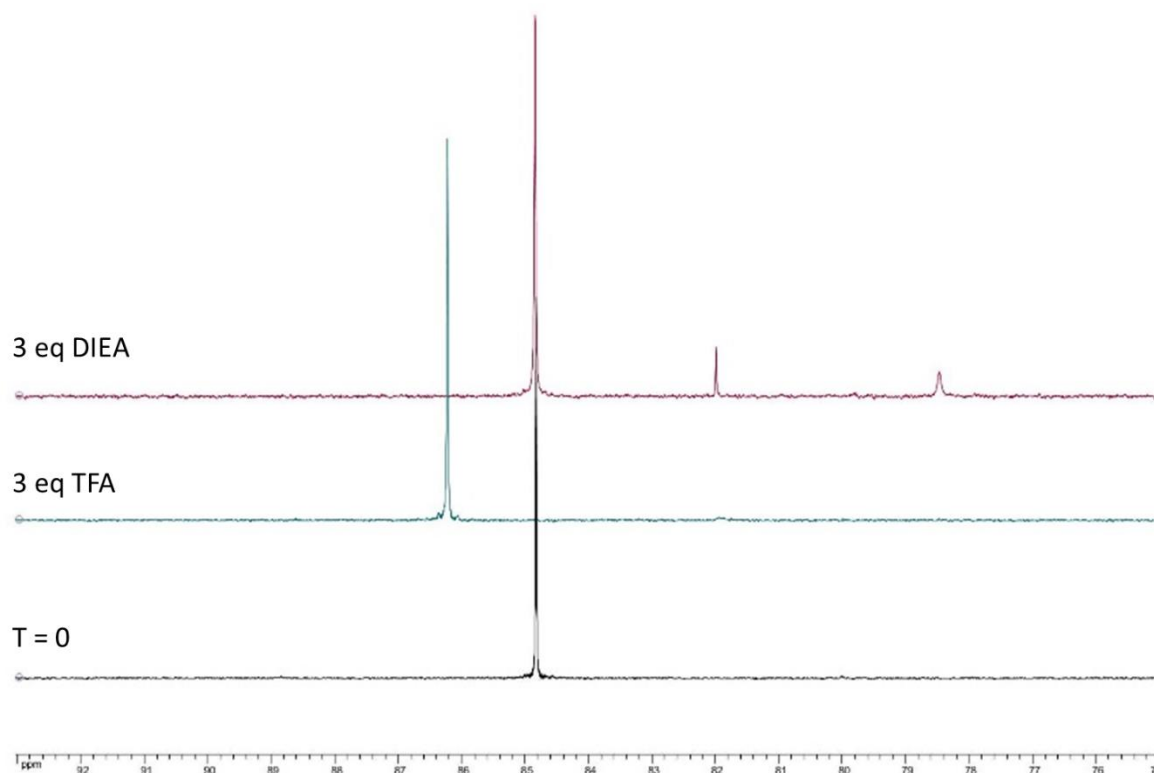

**Figure S1:**  $^{31}\text{P}$  NMR monitoring of the addition of trifluoroacetic acid (3 equivalent) on **3b** and then N,N-diisopropylamine (3 equivalent).



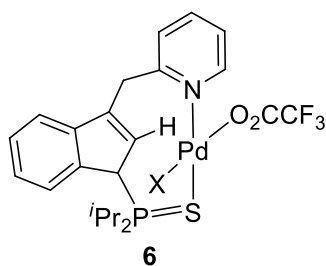

X = Cl or CF<sub>3</sub>CO<sub>2</sub>

**<sup>31</sup>P{<sup>1</sup>H}-NMR** (162 MHz, CDCl<sub>3</sub>): δ ppm 86.2 (s); **<sup>1</sup>H-NMR** (400 MHz, CDCl<sub>3</sub>): δ ppm 8.89 (dd, <sup>3</sup>J<sub>HH</sub> = 5.6 Hz, <sup>4</sup>J<sub>HH</sub> = 0.8 Hz, 1H, H15), 8.09 (m, 1H, H<sub>AroInd</sub>), 8.03 (ddd, <sup>3</sup>J<sub>HH</sub> = 7.6 Hz, <sup>3</sup>J<sub>HH</sub> = 7.6 Hz, <sup>4</sup>J<sub>HH</sub> = 1.6 Hz, 1H, H17), 7.73 (m, 2H, H<sub>AroInd</sub>), 7.66 (d, <sup>3</sup>J<sub>HH</sub> = 7.6 Hz, 1H, H18), 7.53 (m, , 1H, H16), 7.47 (m, 1H, H<sub>AroInd</sub>), 6.38 (brs, 1H, H2), 5.29 (brd, <sup>2</sup>J<sub>HP</sub> = 8 Hz, 1H, H1), 5.14 (brd, 1H, <sup>2</sup>J<sub>HH</sub> = 20 Hz, H10), 3.89 (brd, <sup>2</sup>J<sub>HH</sub> = 20 Hz, H10), 3.11 (m, 1H, H22), 2.71 (m, 1H, H21), 1.82 (dd, <sup>3</sup>J<sub>HP</sub> = 19.6 Hz, <sup>3</sup>J<sub>HH</sub> = 8.0 Hz, 3H, H<sub>3</sub>C<sub>iPr</sub>), 1.76 (dd, <sup>3</sup>J<sub>HP</sub> = 18.0 Hz, <sup>3</sup>J<sub>HH</sub> = 7.2 Hz, 3H, H<sub>3</sub>C<sub>iPr</sub>) 1.73 (dd, <sup>3</sup>J<sub>HP</sub> = 9.6 Hz, <sup>3</sup>J<sub>HH</sub> = 7.2 Hz, 3H, H<sub>3</sub>C<sub>iPr</sub>), 1.27 (dd, <sup>3</sup>J<sub>HP</sub> = 16.6 Hz, <sup>3</sup>J<sub>HH</sub> = 7.0 Hz, 3H, H<sub>3</sub>C<sub>iPr</sub>), 1.11 (dd, <sup>3</sup>J<sub>HP</sub> = 17.6 Hz, <sup>3</sup>J<sub>HH</sub> = 7.0 Hz, 3H, H<sub>3</sub>C<sub>iPr</sub>); **<sup>13</sup>C{<sup>1</sup>H}-NMR** (100 MHz, CDCl<sub>3</sub>): δ ppm 160.07 (q, <sup>2</sup>J<sub>CF</sub> = 38.8 Hz, COCF<sub>3</sub>), 158.55 (s, C12), 151.22 (s, C15), 143.05 (d, d, <sup>2</sup>J<sub>CP</sub> = 3.8 Hz, C9), 141.85 (s, C17), 141.01 (d, <sup>3</sup>J<sub>CP</sub> = 3.4 Hz, C3), 139.50 (d, <sup>3</sup>J<sub>CP</sub> = 4.6 Hz, C4), 132.57 (d, J<sub>CP</sub> = 2.3 Hz, C<sub>AroInd</sub>), 130.92 (d, J<sub>CP</sub> = 1.8 Hz, C<sub>AroInd</sub>), 125.58 (d, J<sub>CP</sub> = 3.1 Hz, C8), 125.39 (s, C16), 124.93 (s, C18), 124.74 (s, C<sub>AroInd</sub>), 115.78 (q, <sup>1</sup>J<sub>CF</sub> = 286.3 Hz, CF<sub>3</sub>), 93.71 (d, <sup>2</sup>J<sub>CP</sub> = 5.8 Hz, C2), 49.71 (d, <sup>1</sup>J<sub>CP</sub> = 36.6 Hz, C1), 40.19 (s, C10), 31.04 (d, <sup>1</sup>J<sub>CP</sub> = 35 Hz, C21), 30.37 (d, <sup>1</sup>J<sub>CP</sub> = 37.3 Hz, C22), 20.04 (d, <sup>2</sup>J<sub>CP</sub> = 2.9 Hz, C26), 18.74 (d, <sup>2</sup>J<sub>CP</sub> = 2.7 Hz, C24), 18.72 (d, <sup>2</sup>J<sub>CP</sub> = 2.0 Hz, C24), 16.05 (d, <sup>2</sup>J<sub>CP</sub> = 2.1 Hz, C23)

#### VI. *In situ* infrared experiments using reactIR 15 Metler Toledo Optic silicium fiber.

To a solution of **3b** (20 mg) in DCM (2 mL) was added 202 µl (1 equivalent) solution of trifluoroacetic acid (0.1 M in DCM) at room temperature under stirring. The reaction mixture was monitored *in situ* by an infrared reactIR. Two new COO stretching bands ( $\nu_a(\text{COO}) = 1610$  and  $\nu_s(\text{COO}) = 1375 \text{ cm}^{-1}$ ) were identified as coordinated TFA. Then subsequent addition of increasing amount of the solution of TFA was done up to 3 equivalents to get complete conversion.

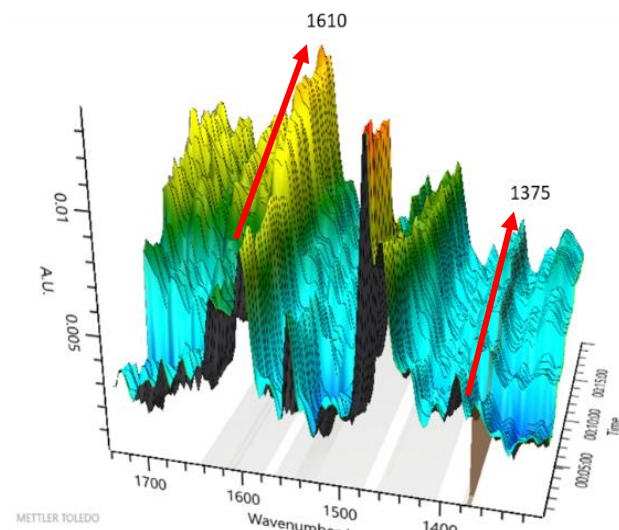

**Figure S2.** IR spectra of the reaction mixture between 1740 and 1300  $\text{cm}^{-1}$ .

## VII. General procedure for catalytic cycloisomerization reactions

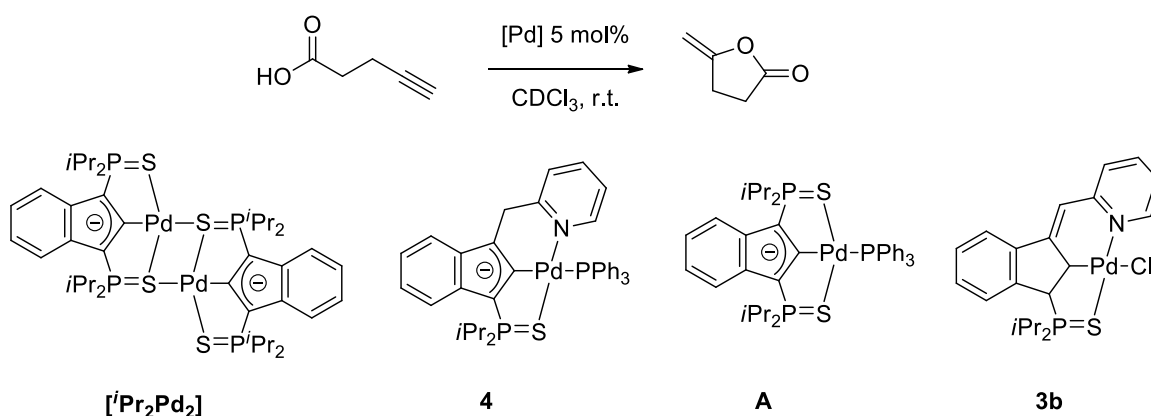

In a NMR pressure tube, 4-pentynoic acid (0.050 mmol) and complex (5 mol% [Pd]) were dissolved in  $\text{CDCl}_3$  (0.5 mL) at room temperature under argon. The reactions were monitored by  $^1\text{H}$  NMR spectroscopy.

## VIII. Selected crystal data

The data were collected at low temperature on a Bruker-AXS APEX II QUAZAR diffractometer (**5**) equipped with a 30W air-cooled microfocus source, and on a Bruker-AXS D8-Venture diffractometer (**3b**) equipped with a CMOS area detector, using  $\text{MoK}\alpha$  radiation ( $\lambda = 0.71073\text{\AA}$ ). Phi- and omega- scans were used. The data were integrated with SAINT, and an

empirical absorption correction with SADABS was applied.<sup>2</sup> The structures were solved using an intrinsic phasing method (SHELXT)<sup>3</sup> and refined using the least-squares method on F<sup>2</sup>.<sup>4</sup> All non-H atoms were refined with anisotropic displacement parameters. The H atoms were refined isotropically at calculated positions using a riding model.

CCDC-1898996 (**3b**) and CCDC-1898855 (**5**) contain the supplementary crystallographic data for this paper. These data can be obtained free of charge from The Cambridge Crystallographic Data Centre via [www.ccdc.cam.ac.uk/data\\_request/cif](http://www.ccdc.cam.ac.uk/data_request/cif).

**Table S1.** Crystal Data, Data Collection, and Structure Refinement for **3b** and **5**

|                                                       | <b>3b</b>                                                                | <b>5</b>                                              |
|-------------------------------------------------------|--------------------------------------------------------------------------|-------------------------------------------------------|
| chemical formula                                      | C <sub>21</sub> H <sub>25</sub> ClNPPdS, CH <sub>2</sub> Cl <sub>2</sub> | C <sub>39</sub> H <sub>43</sub> ClN <sub>3</sub> PPdS |
| <i>Mr</i>                                             | 581.22                                                                   | 758.64                                                |
| crystal system                                        | triclinic                                                                | monoclinic                                            |
| space group                                           | <i>P</i> $\bar{1}$                                                       | <i>P</i> 2 <sub>1</sub> /n                            |
| <i>a</i> [Å]                                          | 9.0650(5)                                                                | 10.0673(7)                                            |
| <i>b</i> [Å]                                          | 10.7440(6)                                                               | 20.0097(13)                                           |
| <i>c</i> [Å]                                          | 13.3785(8)                                                               | 17.8258(12)                                           |
| $\alpha$ [°]                                          | 80.298(2)                                                                | 90                                                    |
| $\beta$ [°]                                           | 75.096(2)                                                                | 98.505(2)                                             |
| $\gamma$ [°]                                          | 78.795(2)                                                                | 90                                                    |
| <i>V</i> [Å <sup>3</sup> ]                            | 9573.8(5)                                                                | 3551.4(4)                                             |
| <i>Z</i>                                              | 2                                                                        | 4                                                     |
| $\rho_{calc}$ [g cm <sup>-3</sup> ]                   | 1.575                                                                    | 1.419                                                 |
| $\lambda$ [Å]                                         | 0.71073                                                                  | 0.71073                                               |
| <i>T</i> [K]                                          | 253(2)                                                                   | 193(2)                                                |
| $\mu$ (MoK $\alpha$ ) [mm <sup>-1</sup> ]             | 1.245                                                                    | 0.734                                                 |
| crystal size (mm <sup>3</sup> )                       | 0.12 x 0.08 x 0.06                                                       | 0.12 x 0.08 x 0.04                                    |
| Reflections collected                                 | 21191                                                                    | 69386                                                 |
| Independent reflections                               | 4316 [R(int) = 0.0399]                                                   | 6479 [R(int) = 0.0850]                                |
| Data/Restraints/Parameters                            | 4316 / 72 / 294                                                          | 6479 / 0 / 423                                        |
| GOF on F <sup>2</sup>                                 | 1.127                                                                    | 1.087                                                 |
| <i>R</i> ( <i>I</i> > 2 $\sigma$ ( <i>I</i> ))        | 0.0388                                                                   | 0.0402                                                |
| <i>wR</i> <sup>2</sup> (all data)                     | 0.0838                                                                   | 0.1157                                                |
| Largest difference peak and hole [e Å <sup>-3</sup> ] | 1.010 and -0.629                                                         | 0.787 and -0.682                                      |

<sup>2</sup> SAINT, SADABS, Programs for data correction, Bruker–AXS.

<sup>3</sup> ShelXT, G. M. Sheldrick, University of Göttingen, *Acta Crystallogr. Sect. A*, 2015, **71**, 3.

<sup>4</sup> ShelXL, G. M. Sheldrick, University of Göttingen, *Acta Crystallogr. Sect. C*, 2015, **71**, 3.

$^1\text{H}$  NMR in  $\text{CDCl}_3$

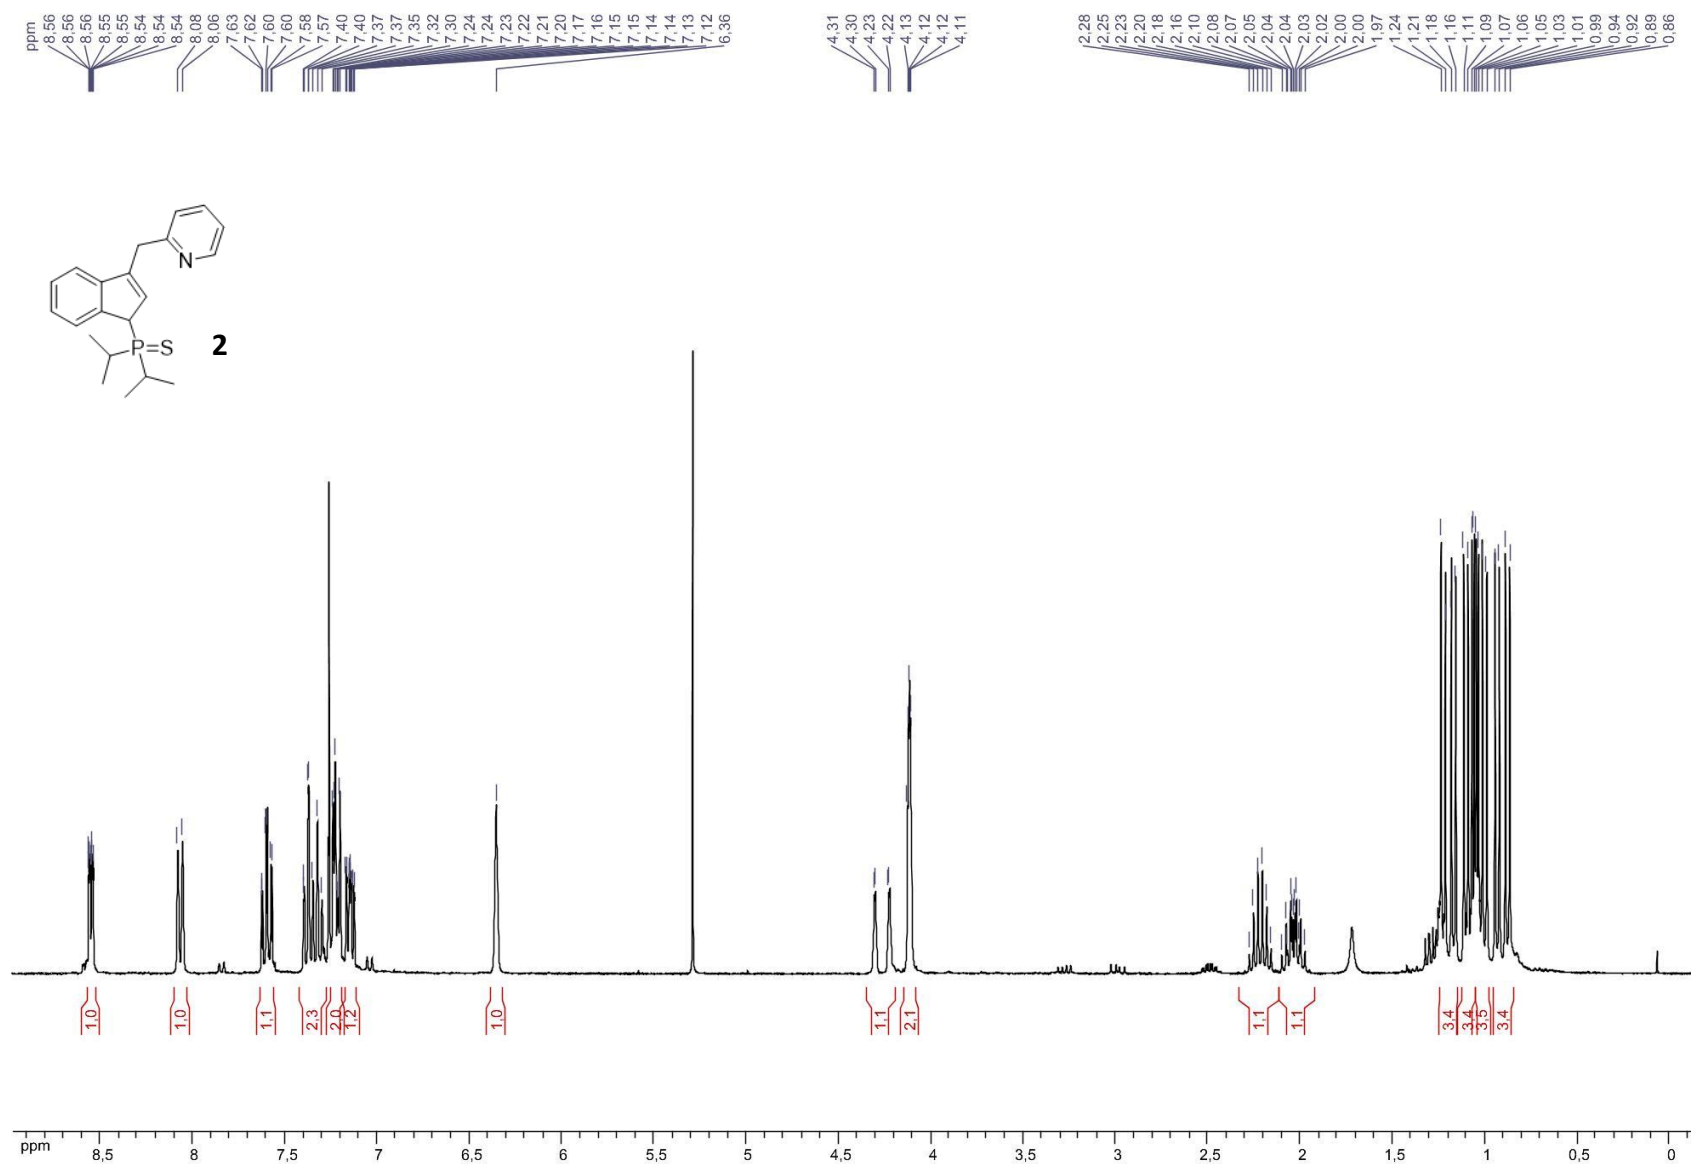

$^{13}\text{C}$  NMR in  $\text{CDCl}_3$

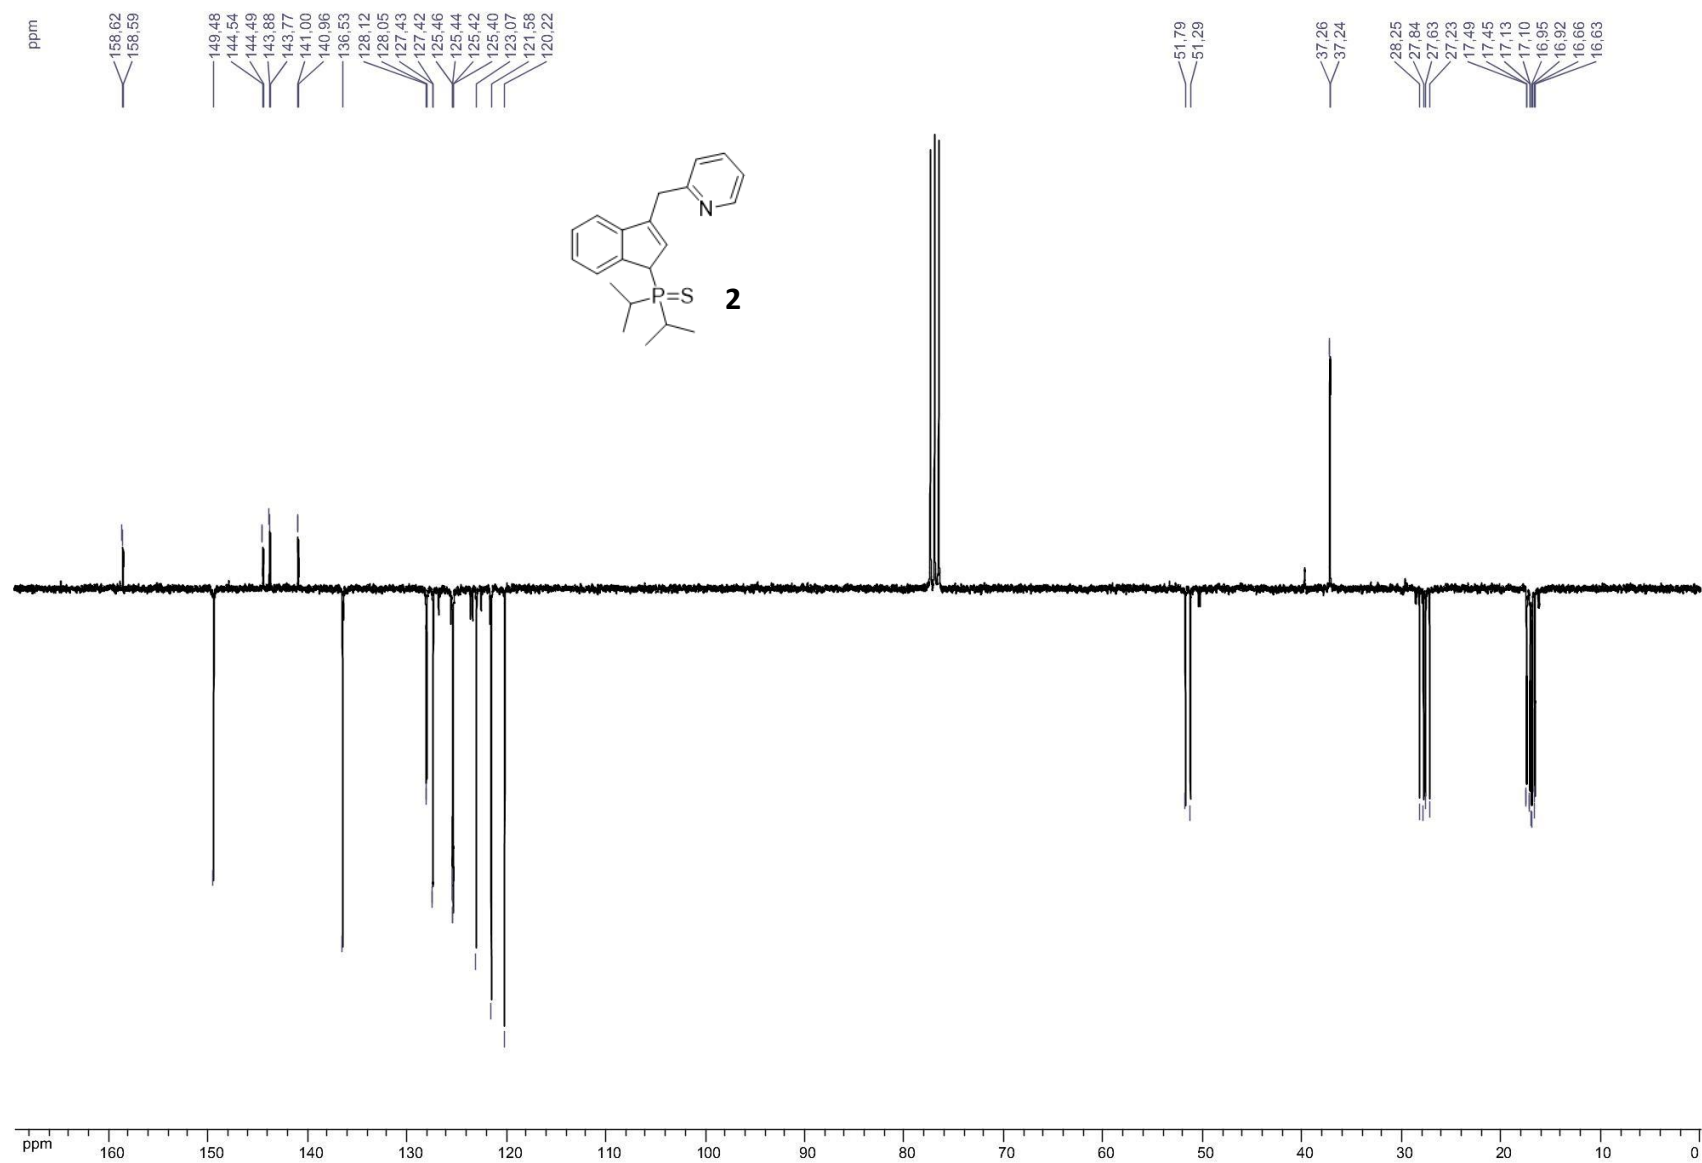

$^{31}\text{P}$  NMR in  $\text{CDCl}_3$

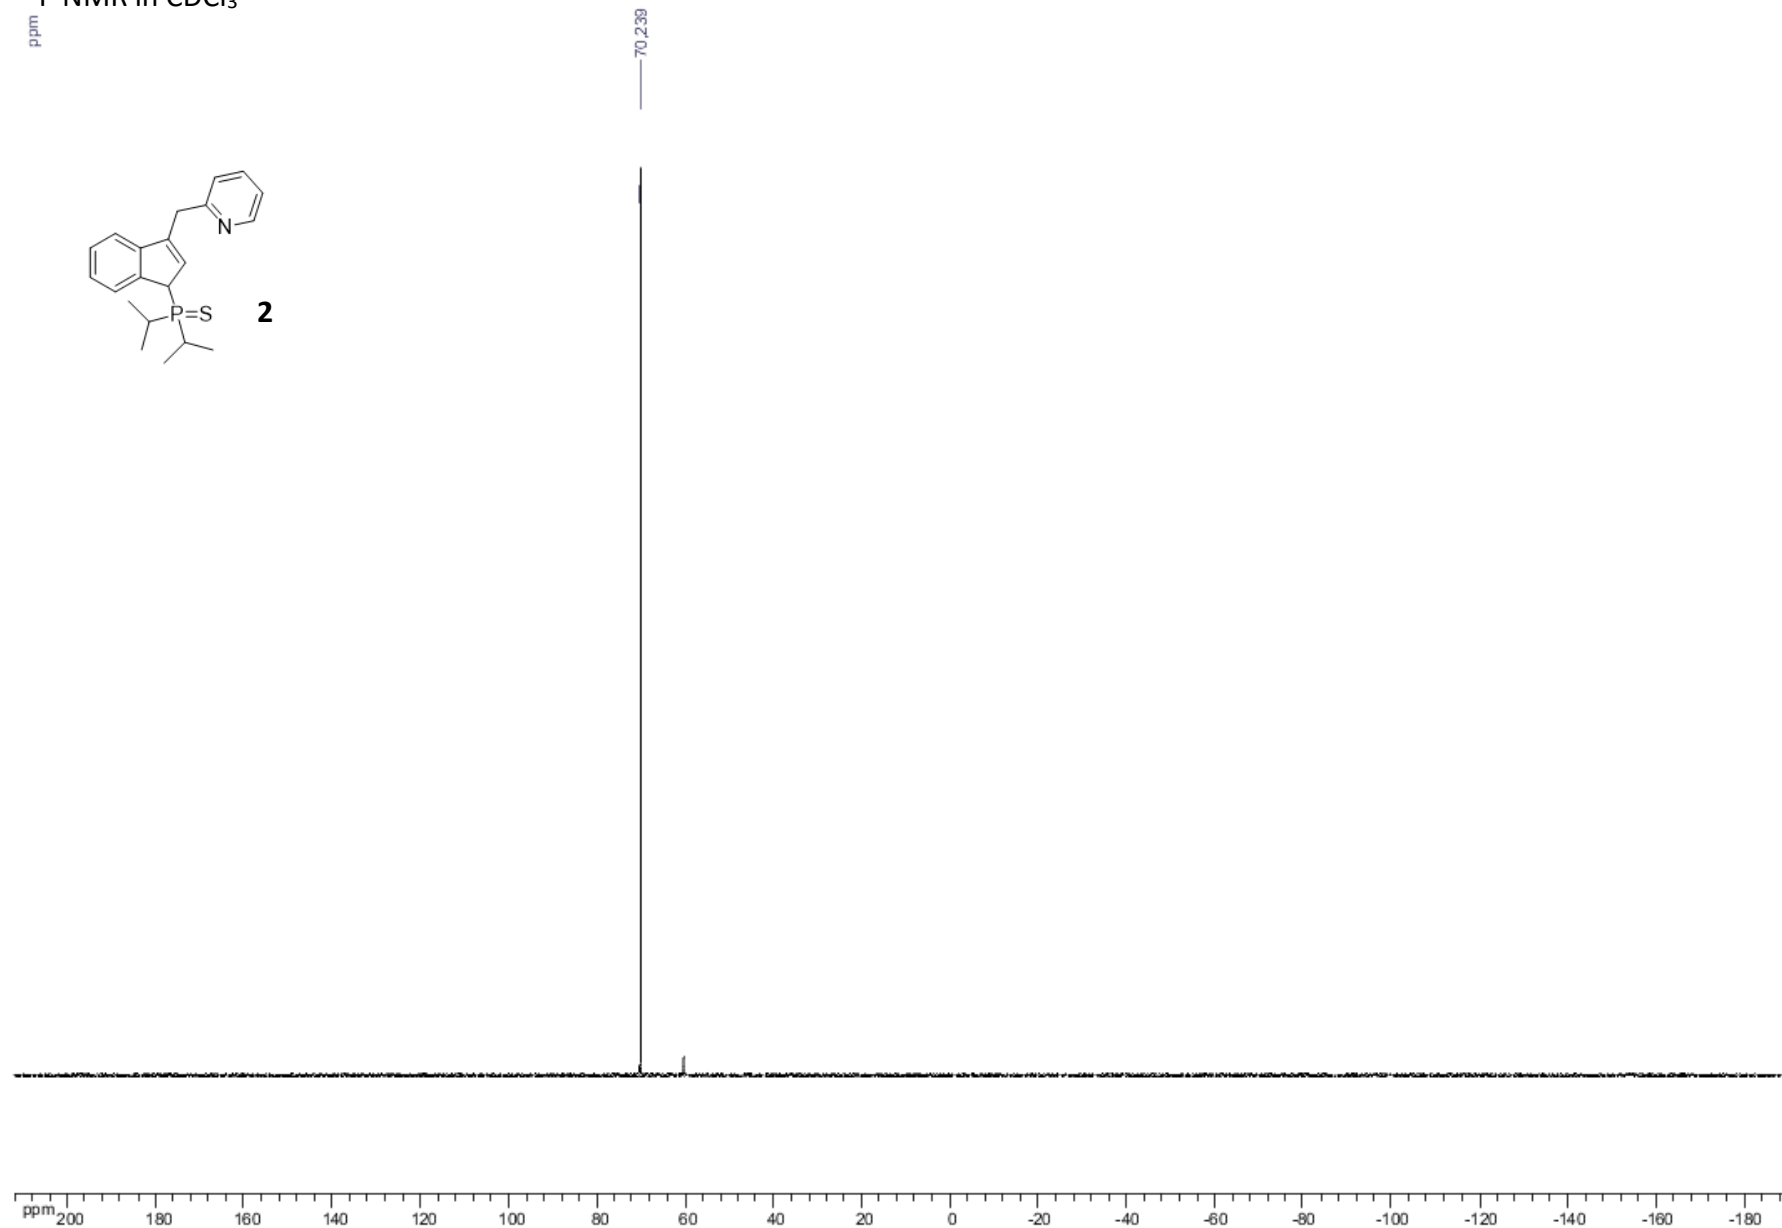

$^1\text{H}$  NMR in  $\text{CDCl}_3$

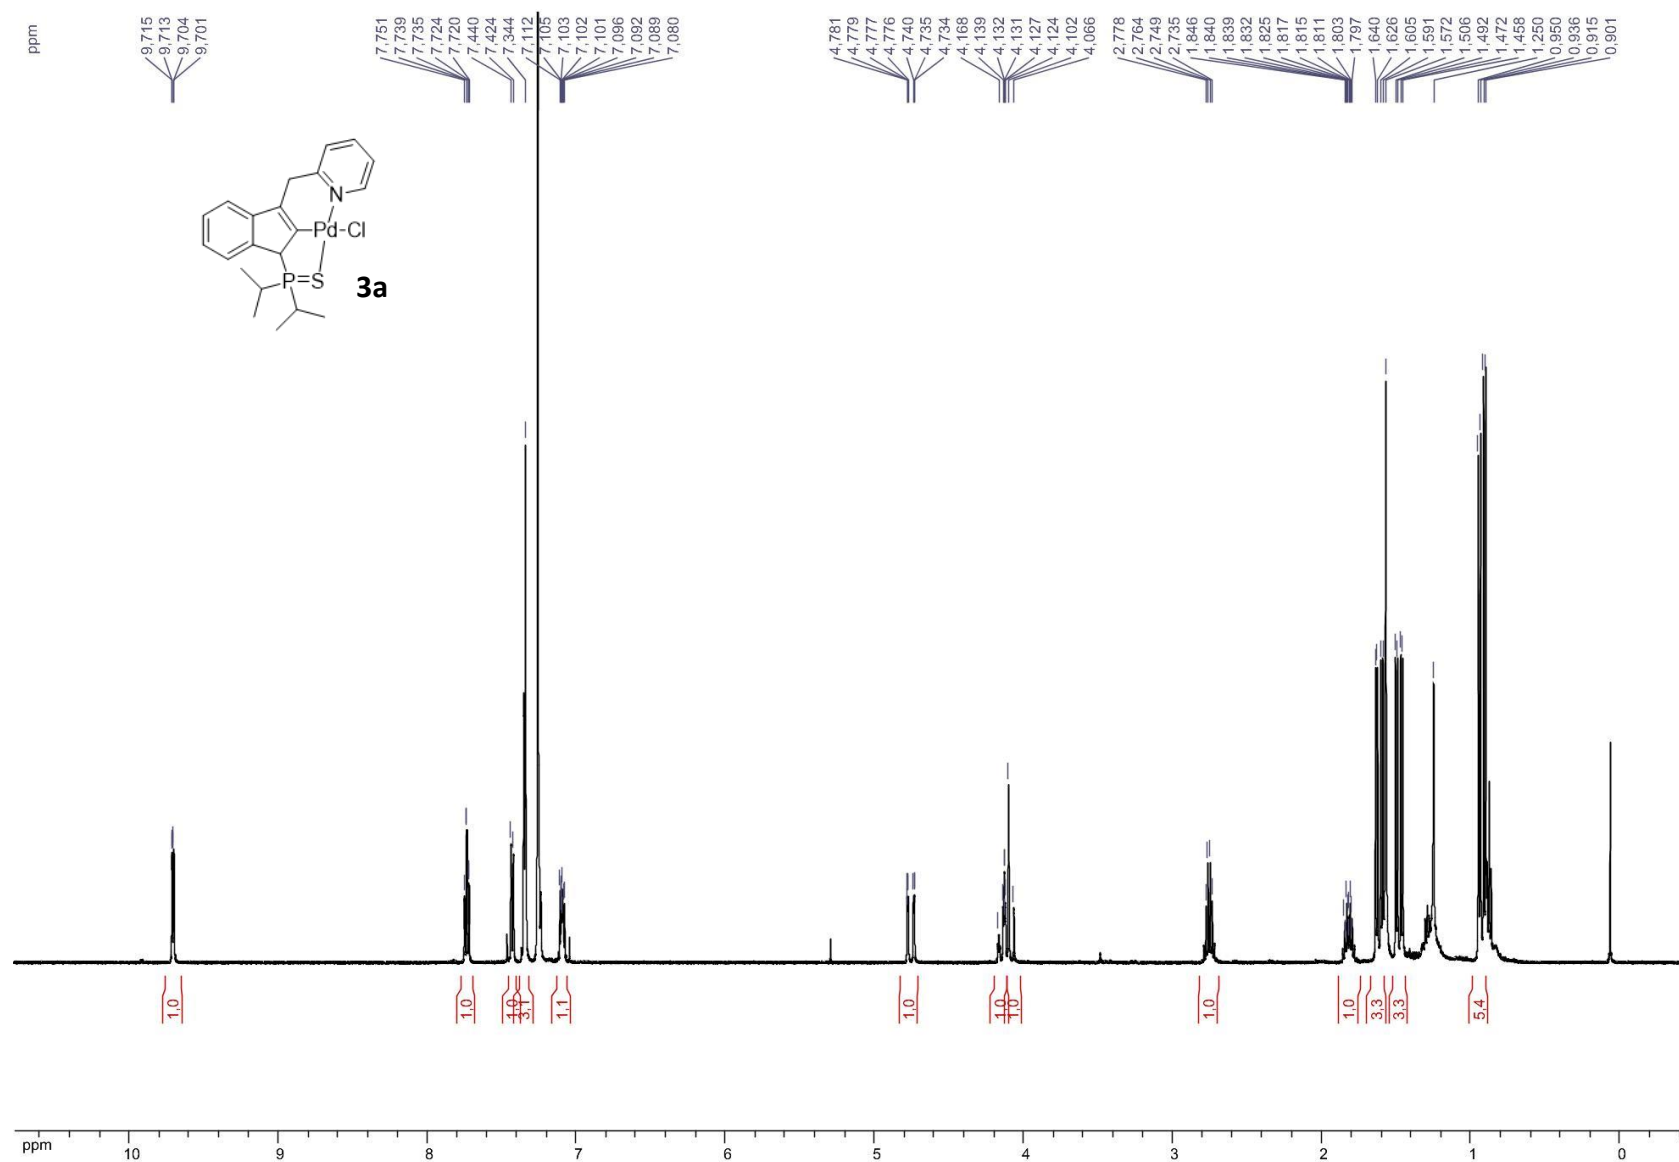

$^{13}\text{C}$  NMR in  $\text{CDCl}_3$

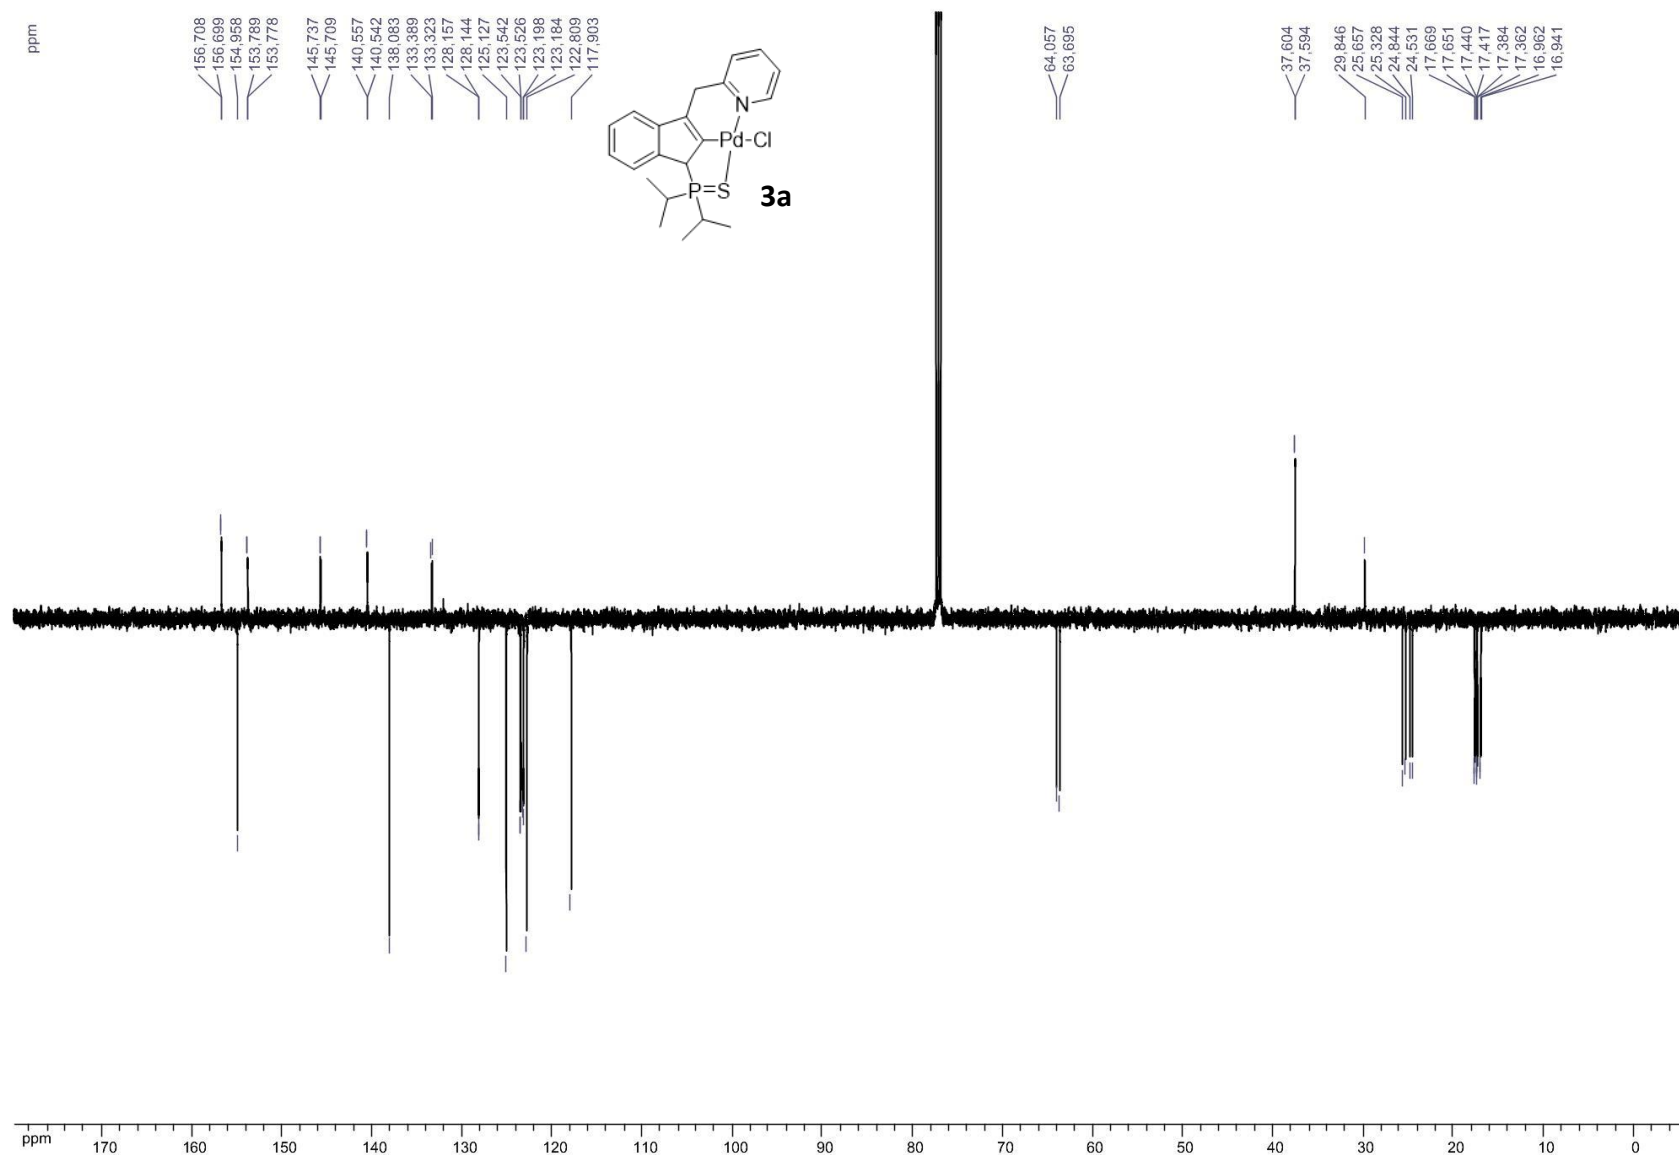



$^{31}\text{P}$  NMR in  $\text{CDCl}_3$

ppm

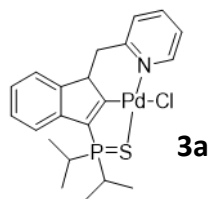

**3a**

81.395

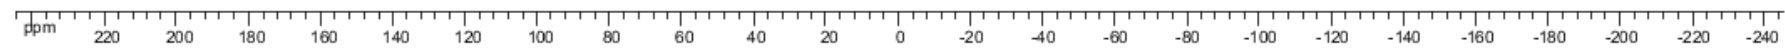

$^1\text{H}$  NMR in  $\text{CDCl}_3$

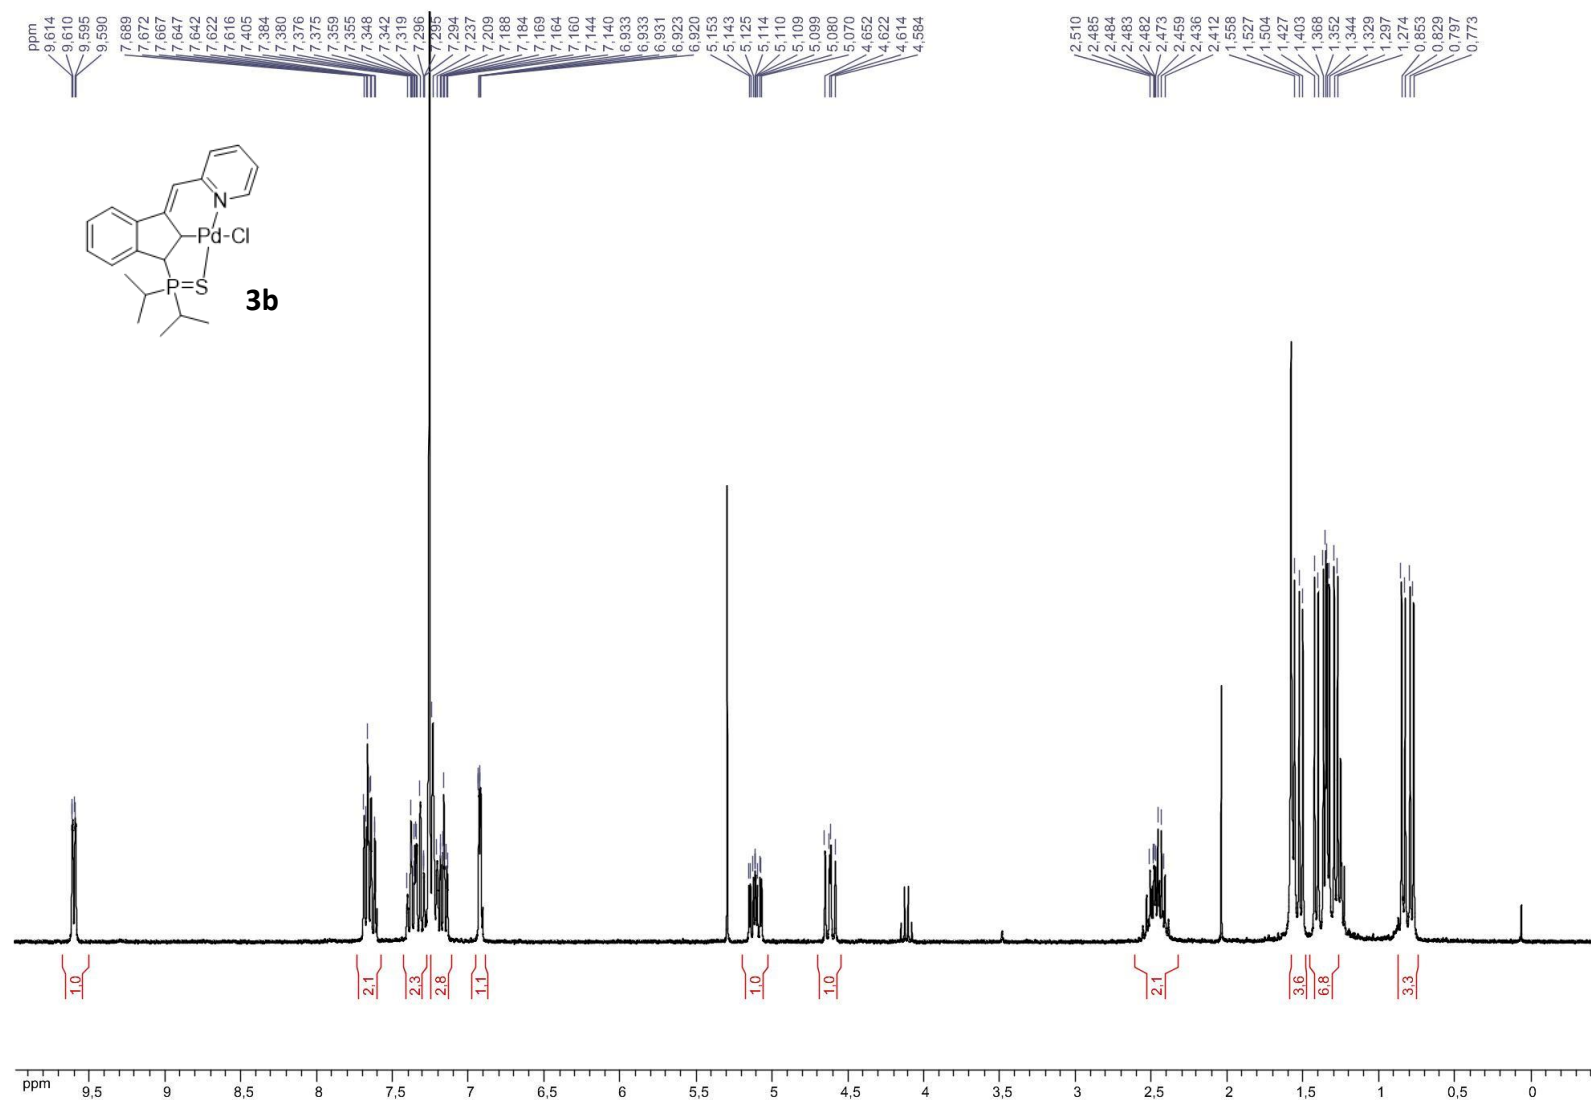

$^{13}\text{C}$  NMR in  $\text{CDCl}_3$

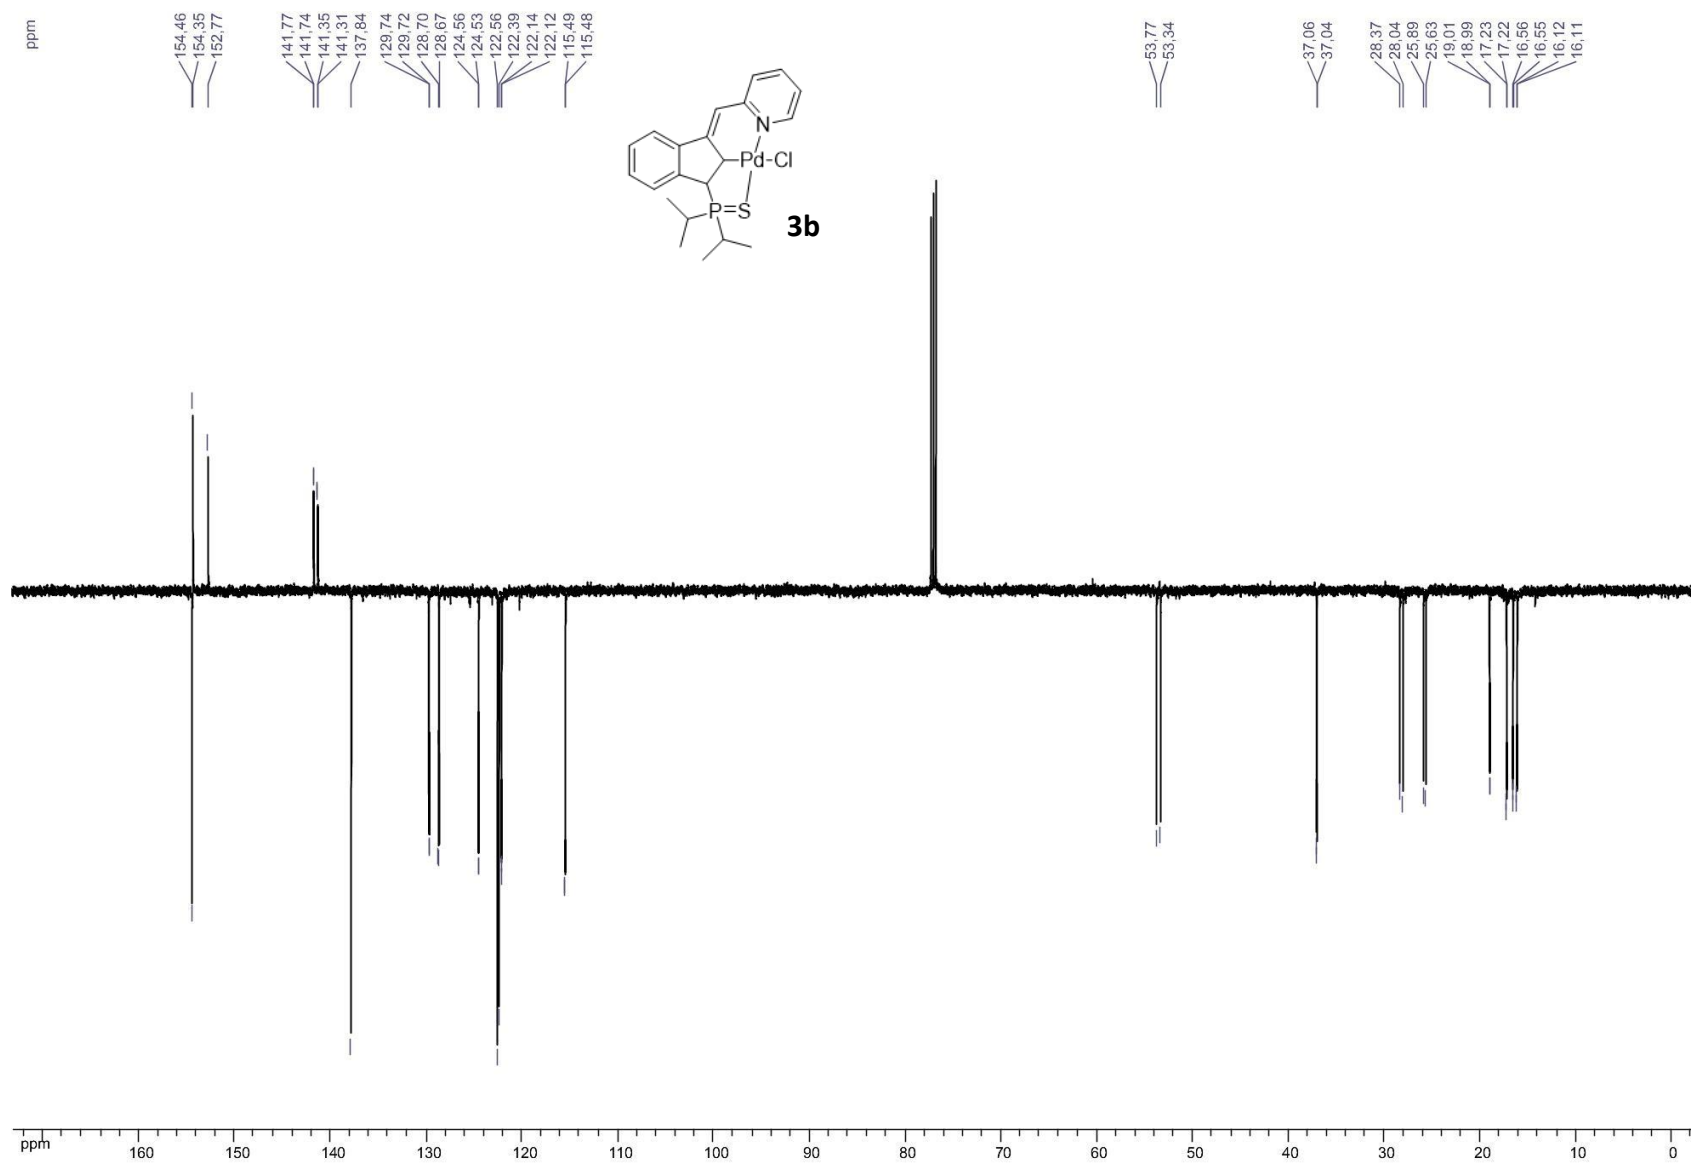

$^{31}\text{P}$  NMR in  $\text{CDCl}_3$

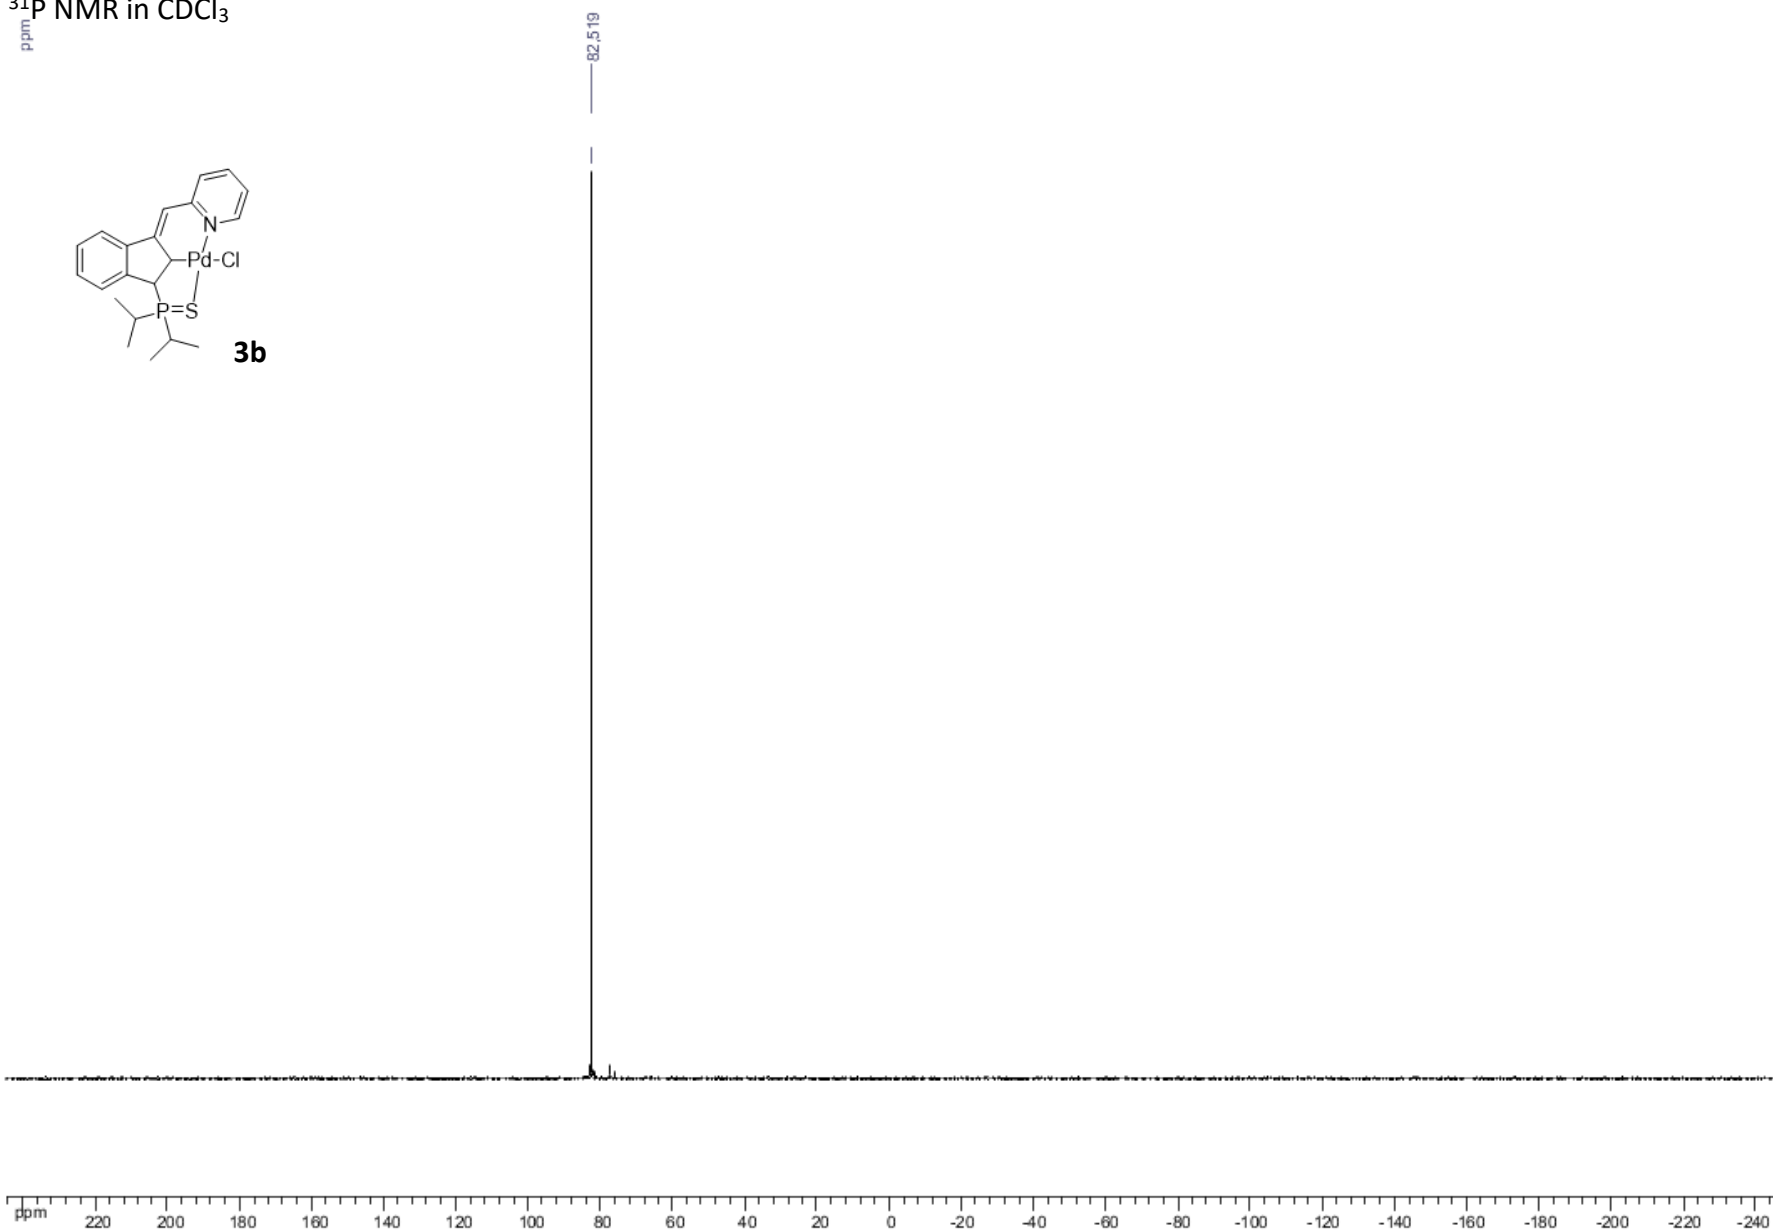

$^1\text{H}$  NMR in  $\text{CDCl}_3$

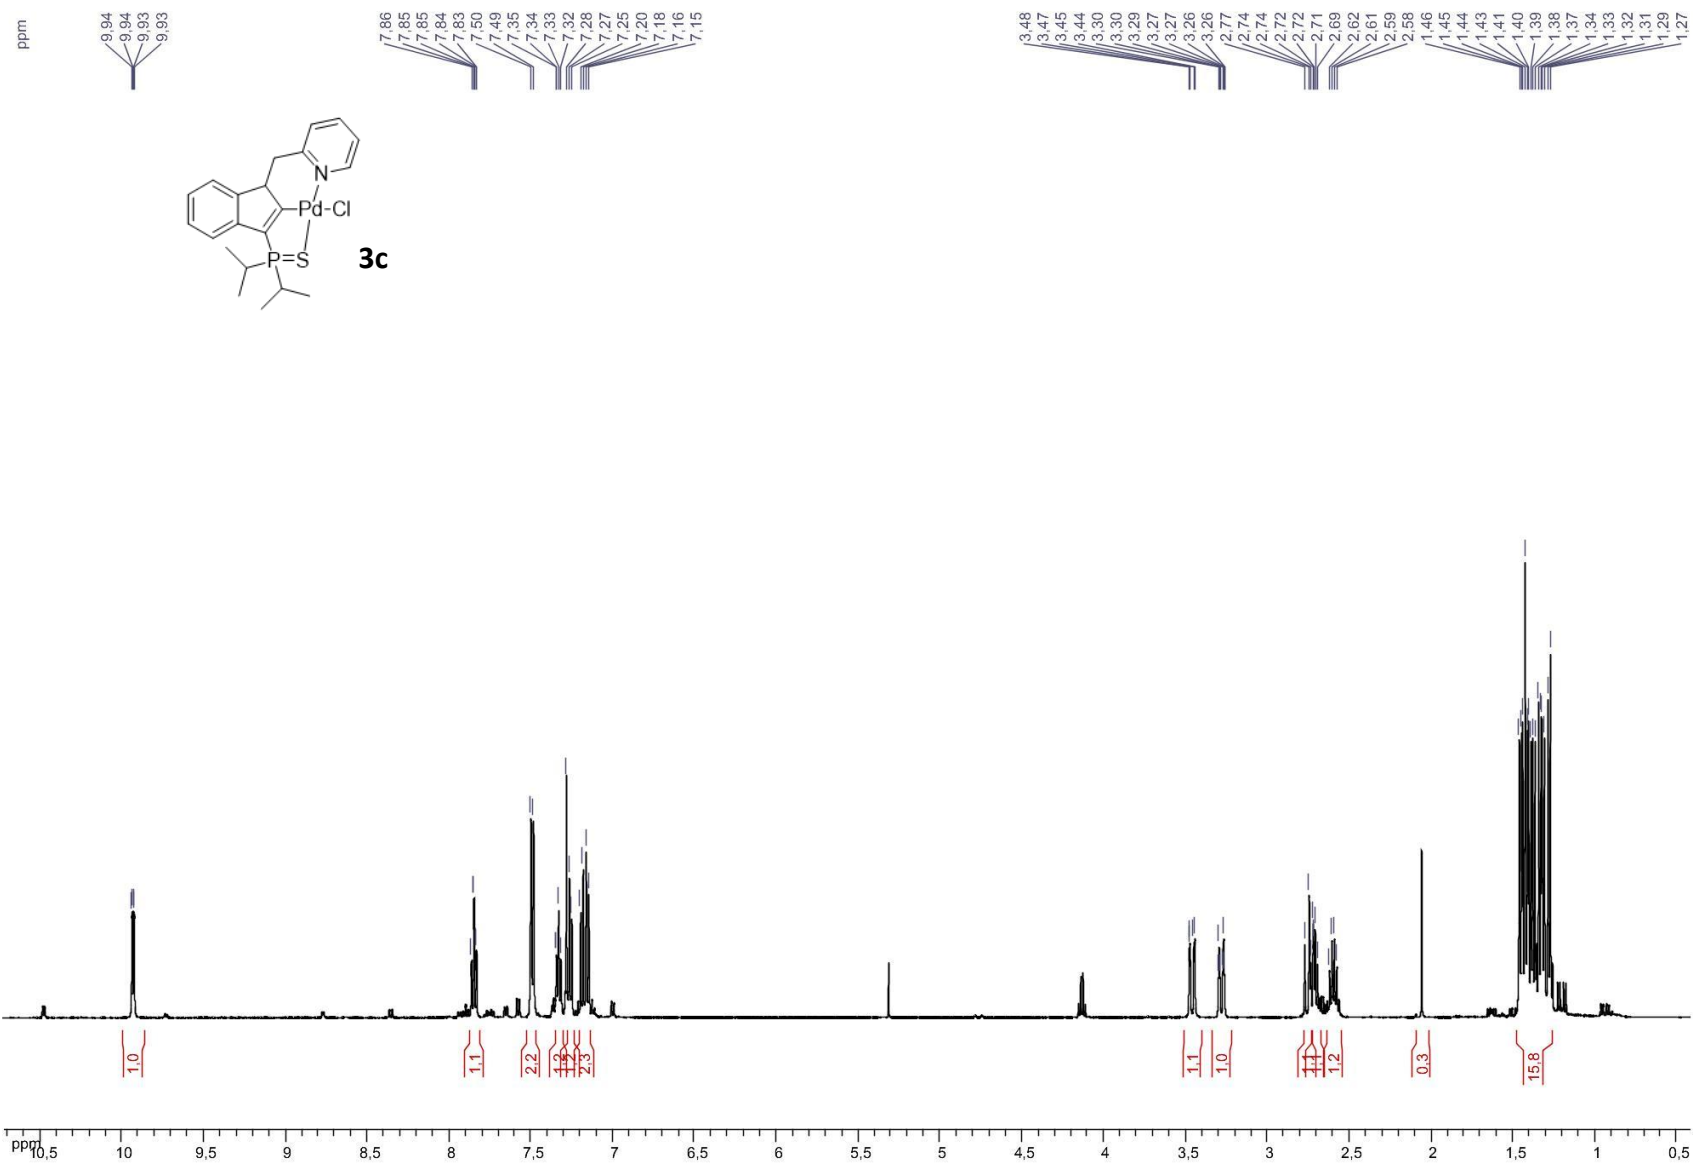

$^{13}\text{C}$  NMR in  $\text{CDCl}_3$

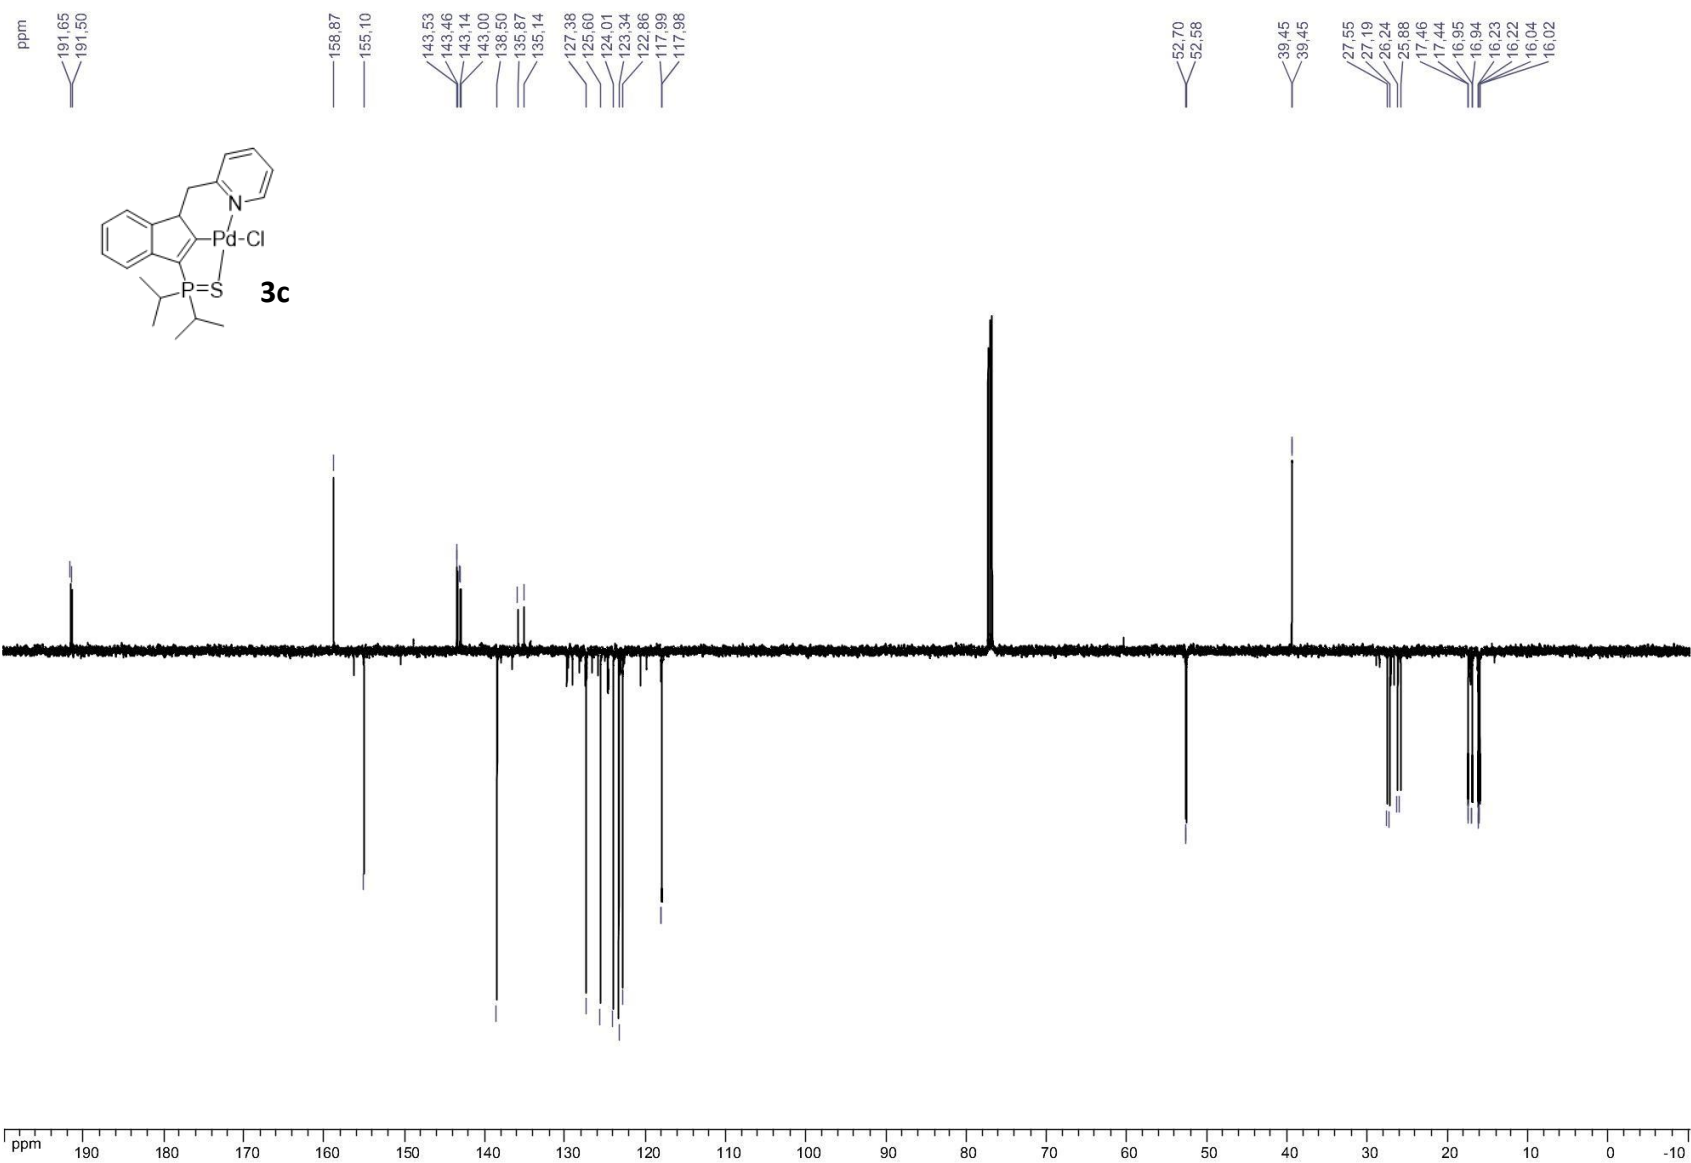

$^{31}\text{P}$  NMR in  $\text{CDCl}_3$

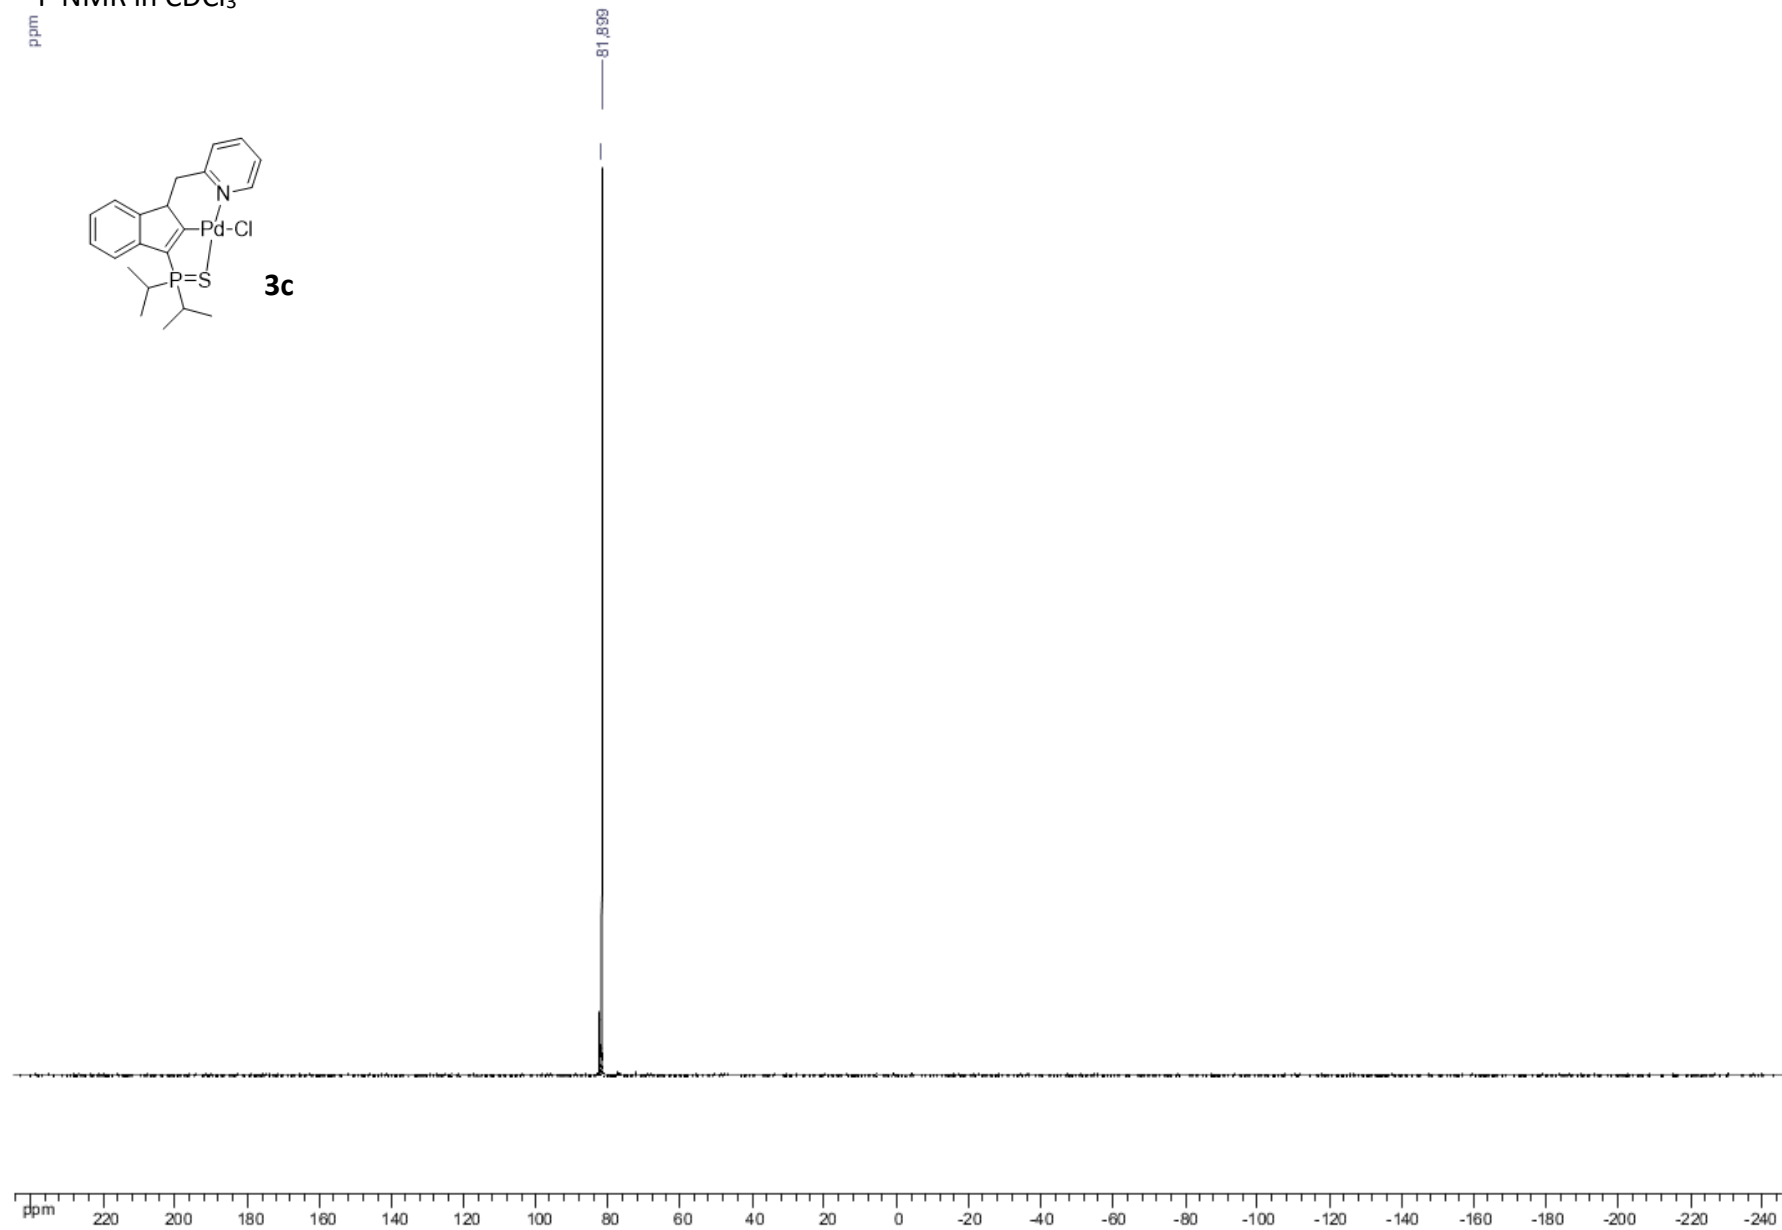

$^1\text{H}$  NMR in  $\text{C}_6\text{D}_6$

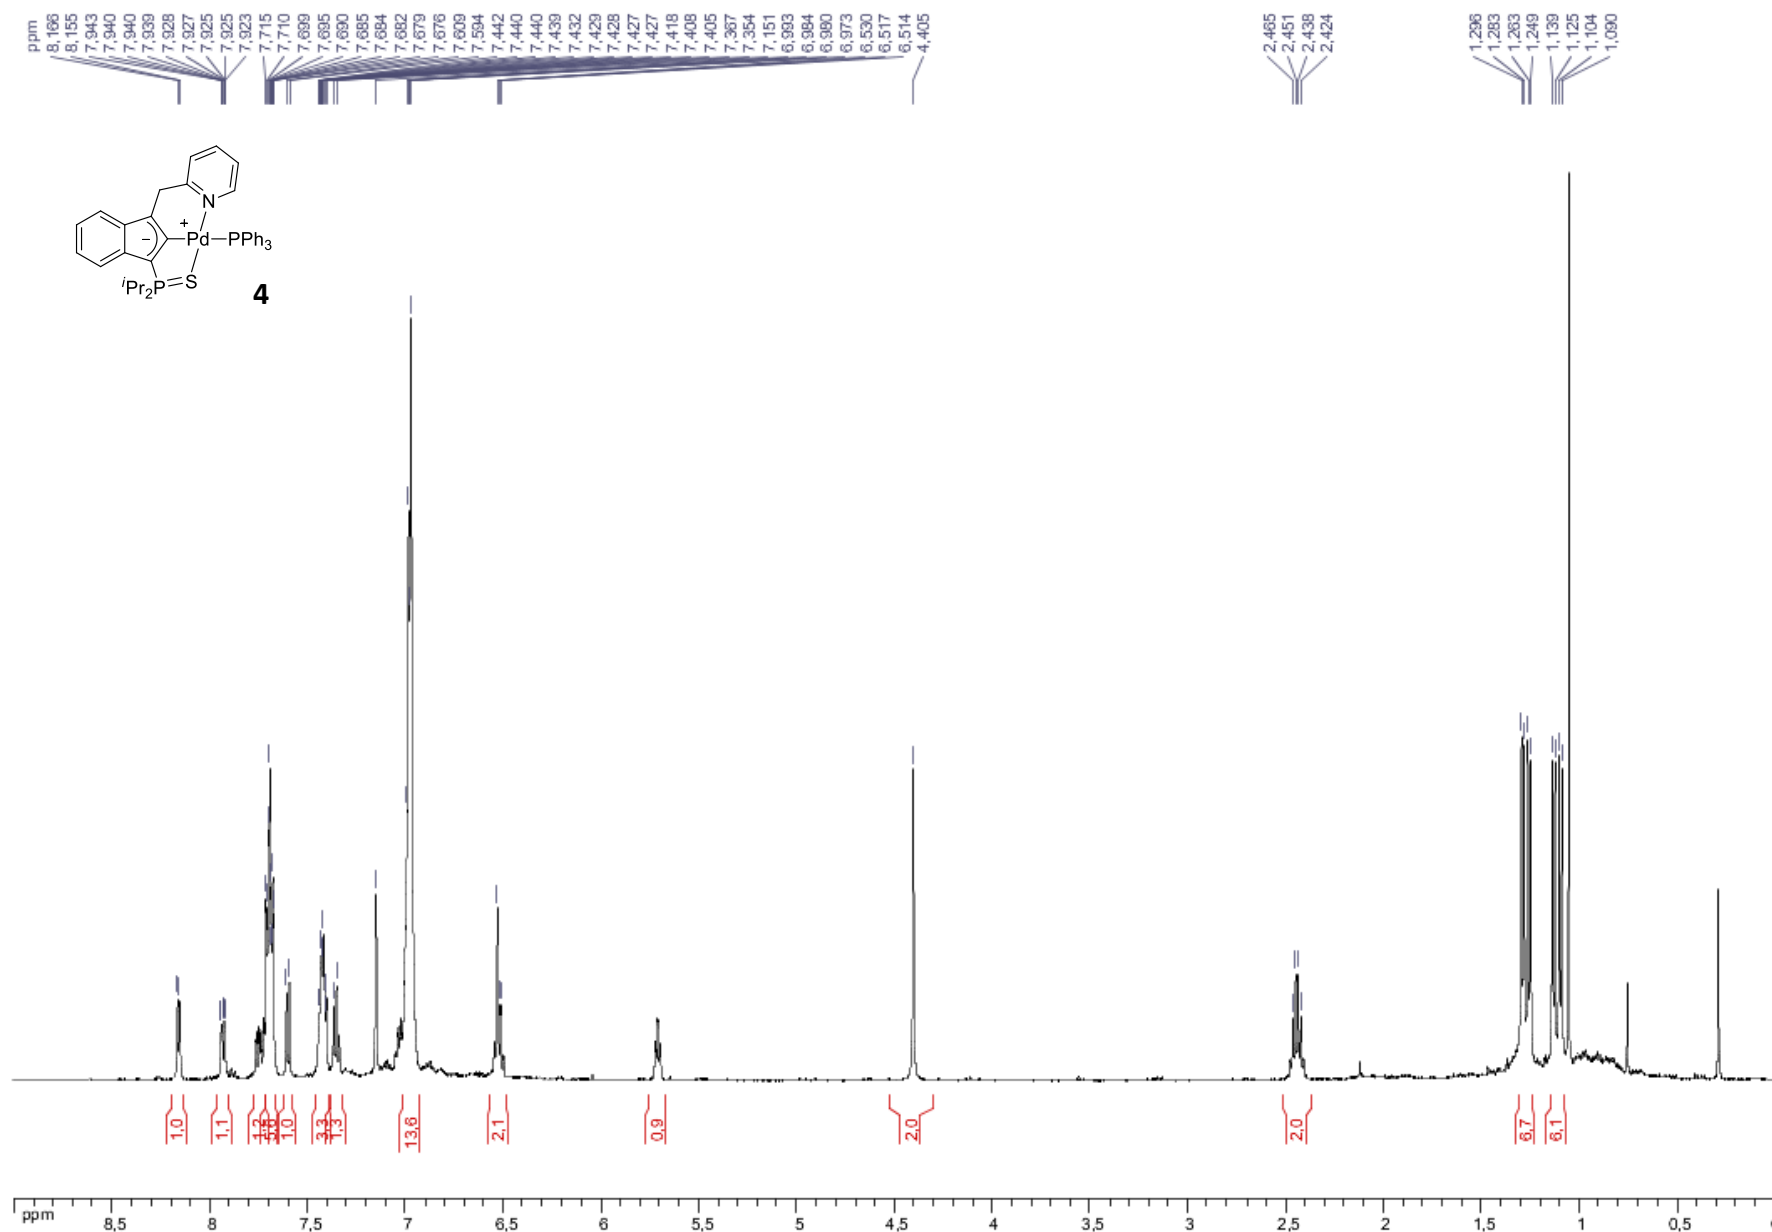



$^{13}\text{C}$  NMR in  $\text{C}_6\text{D}_6$

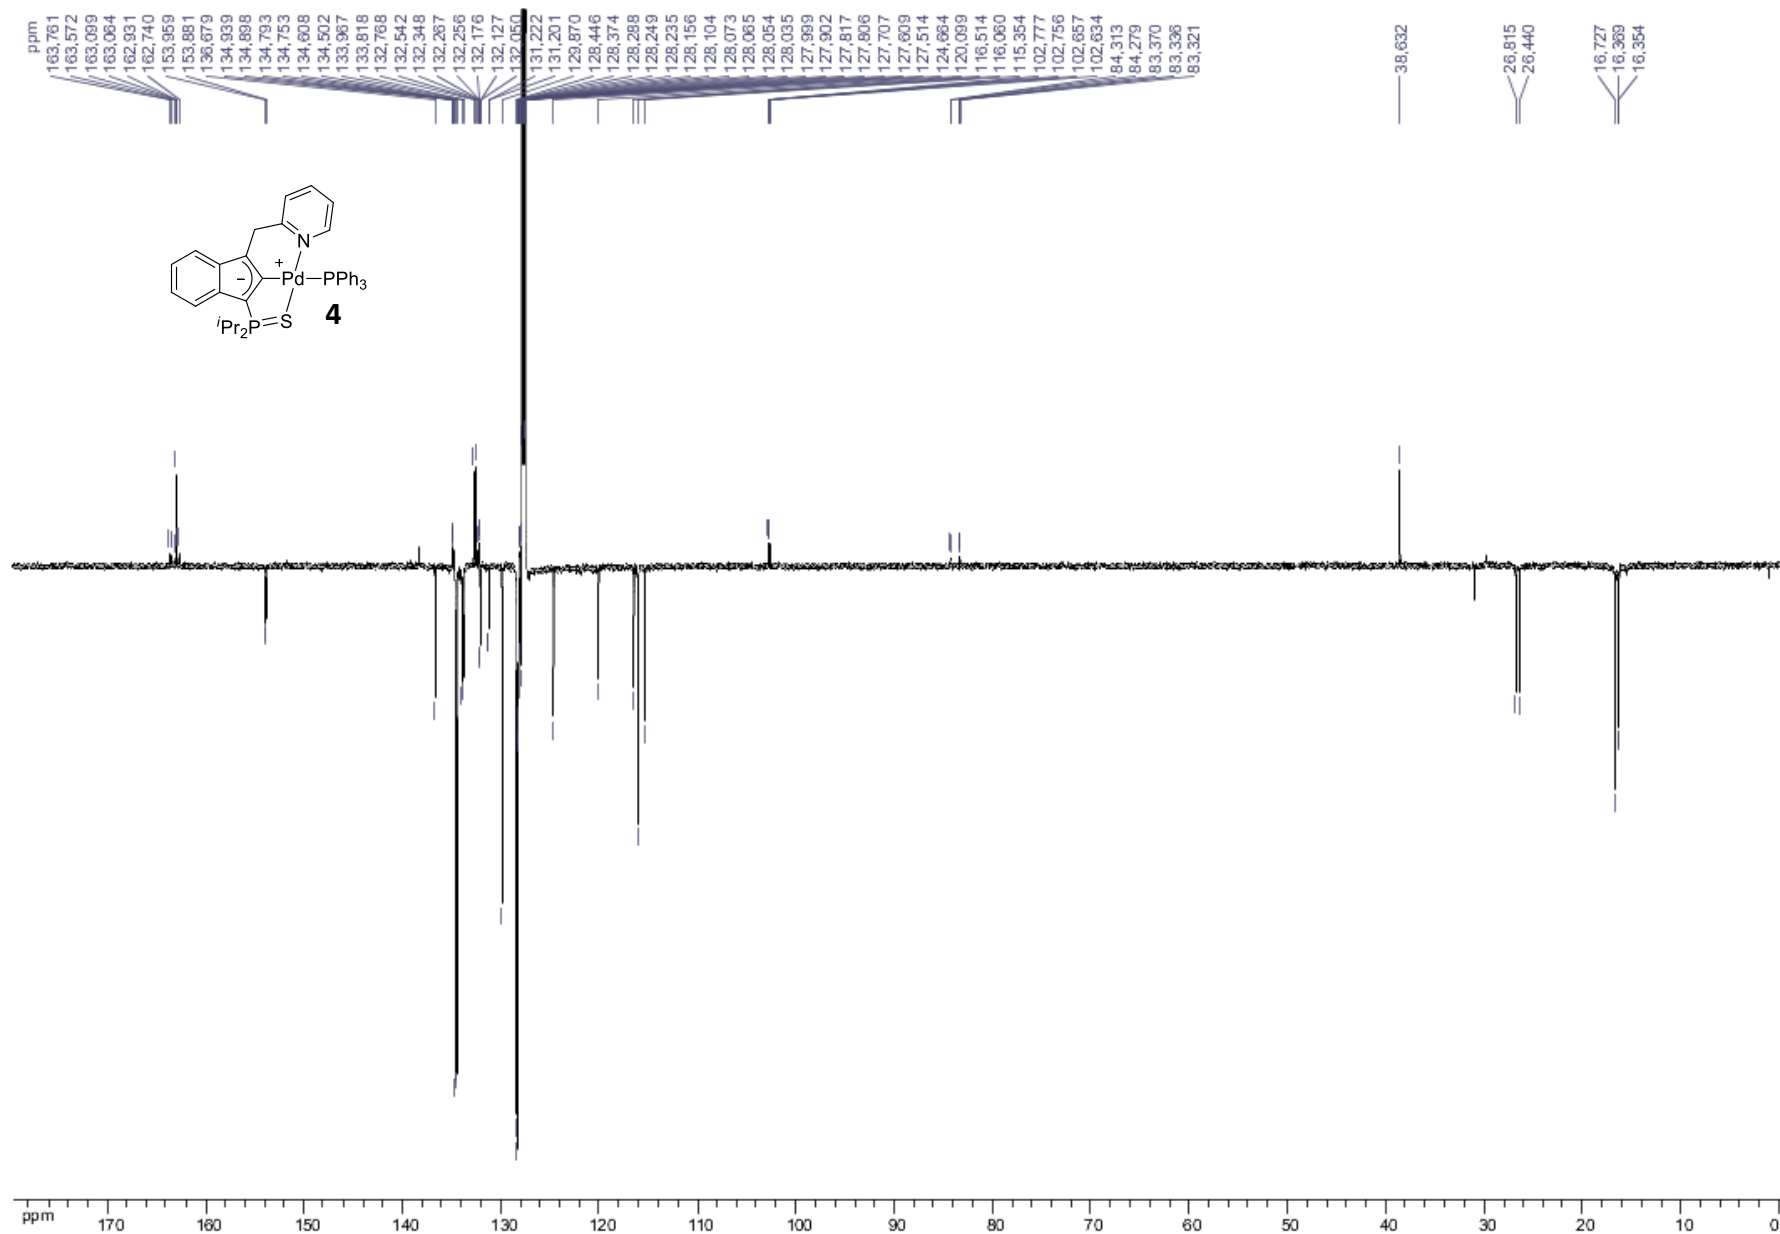

$^{31}\text{P}$  NMR in  $\text{C}_6\text{D}_6$

ppm

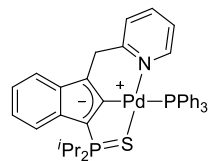

**4**

75.492  
75.107

17.908  
17.521

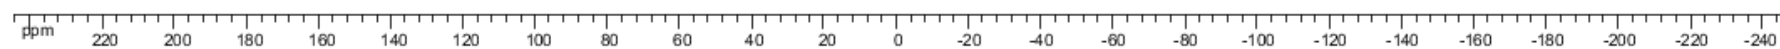

$^1\text{H}$  NMR  $\text{CD}_2\text{Cl}_2$

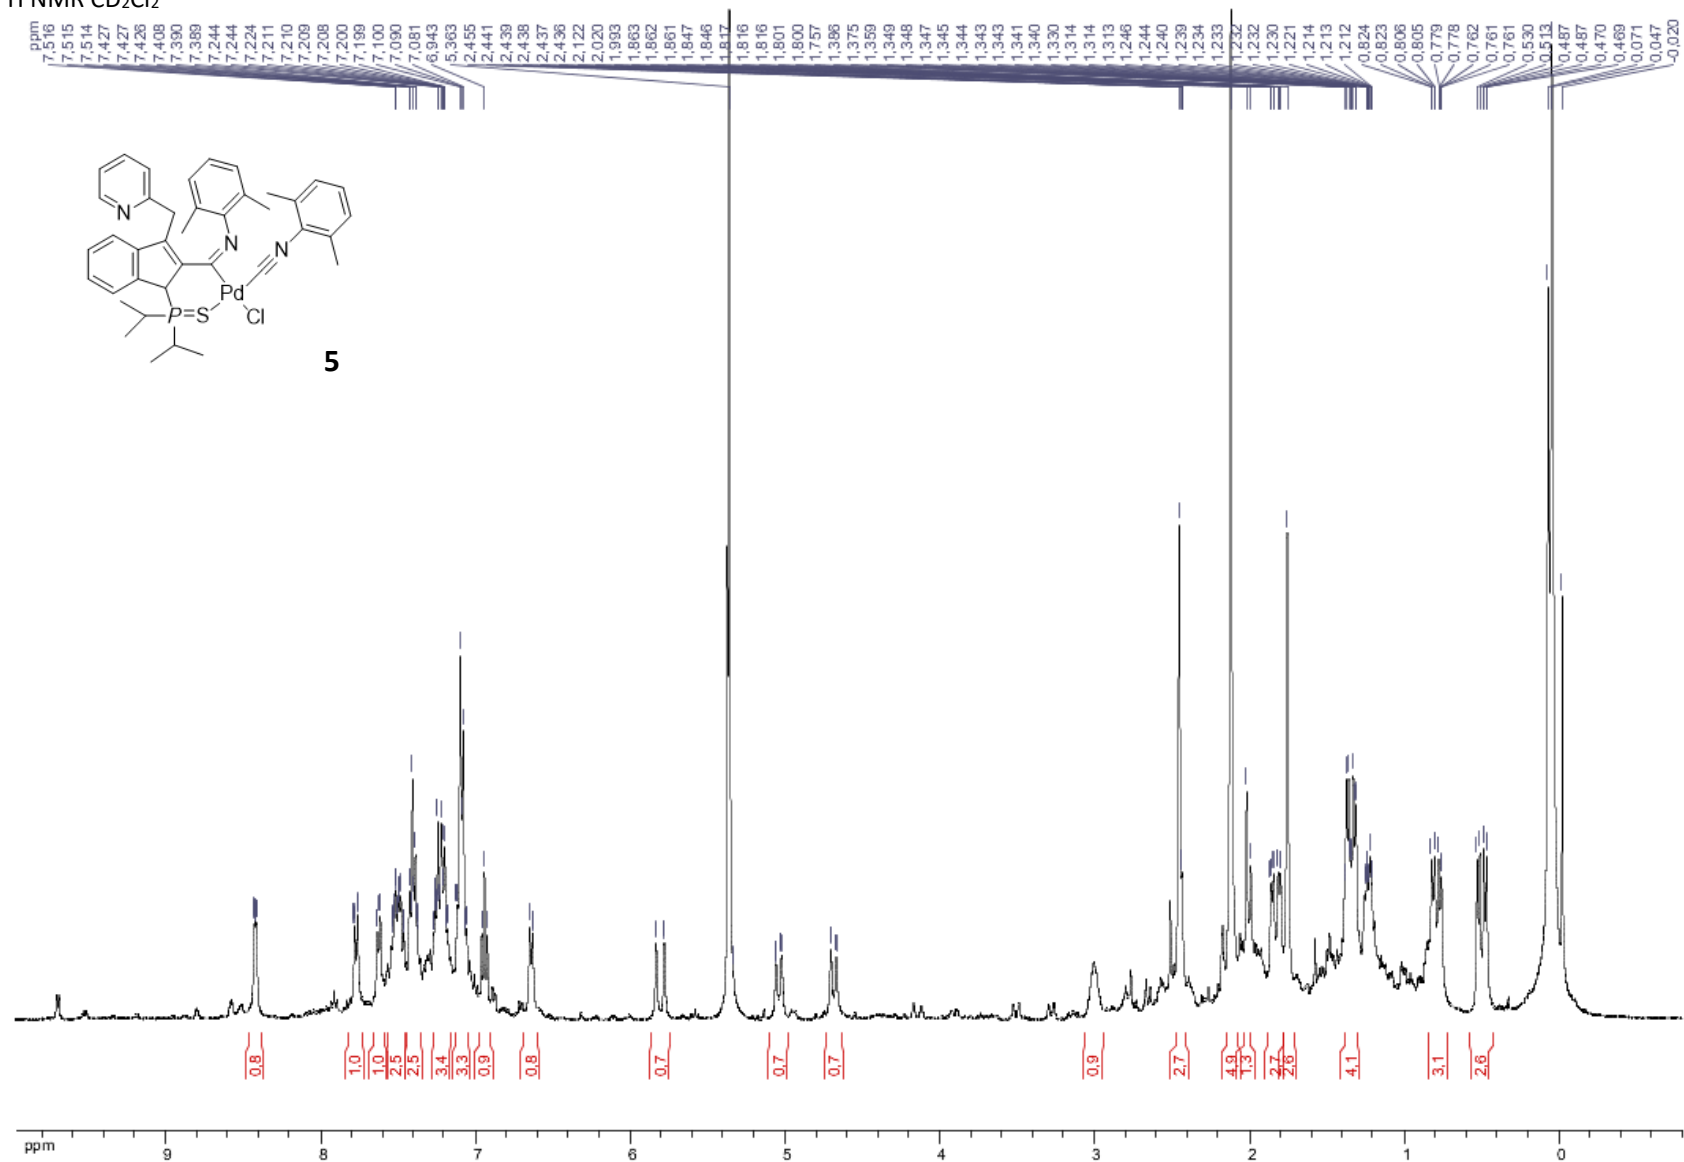

$^{13}\text{C}$  NMR  $\text{CD}_2\text{Cl}_2$

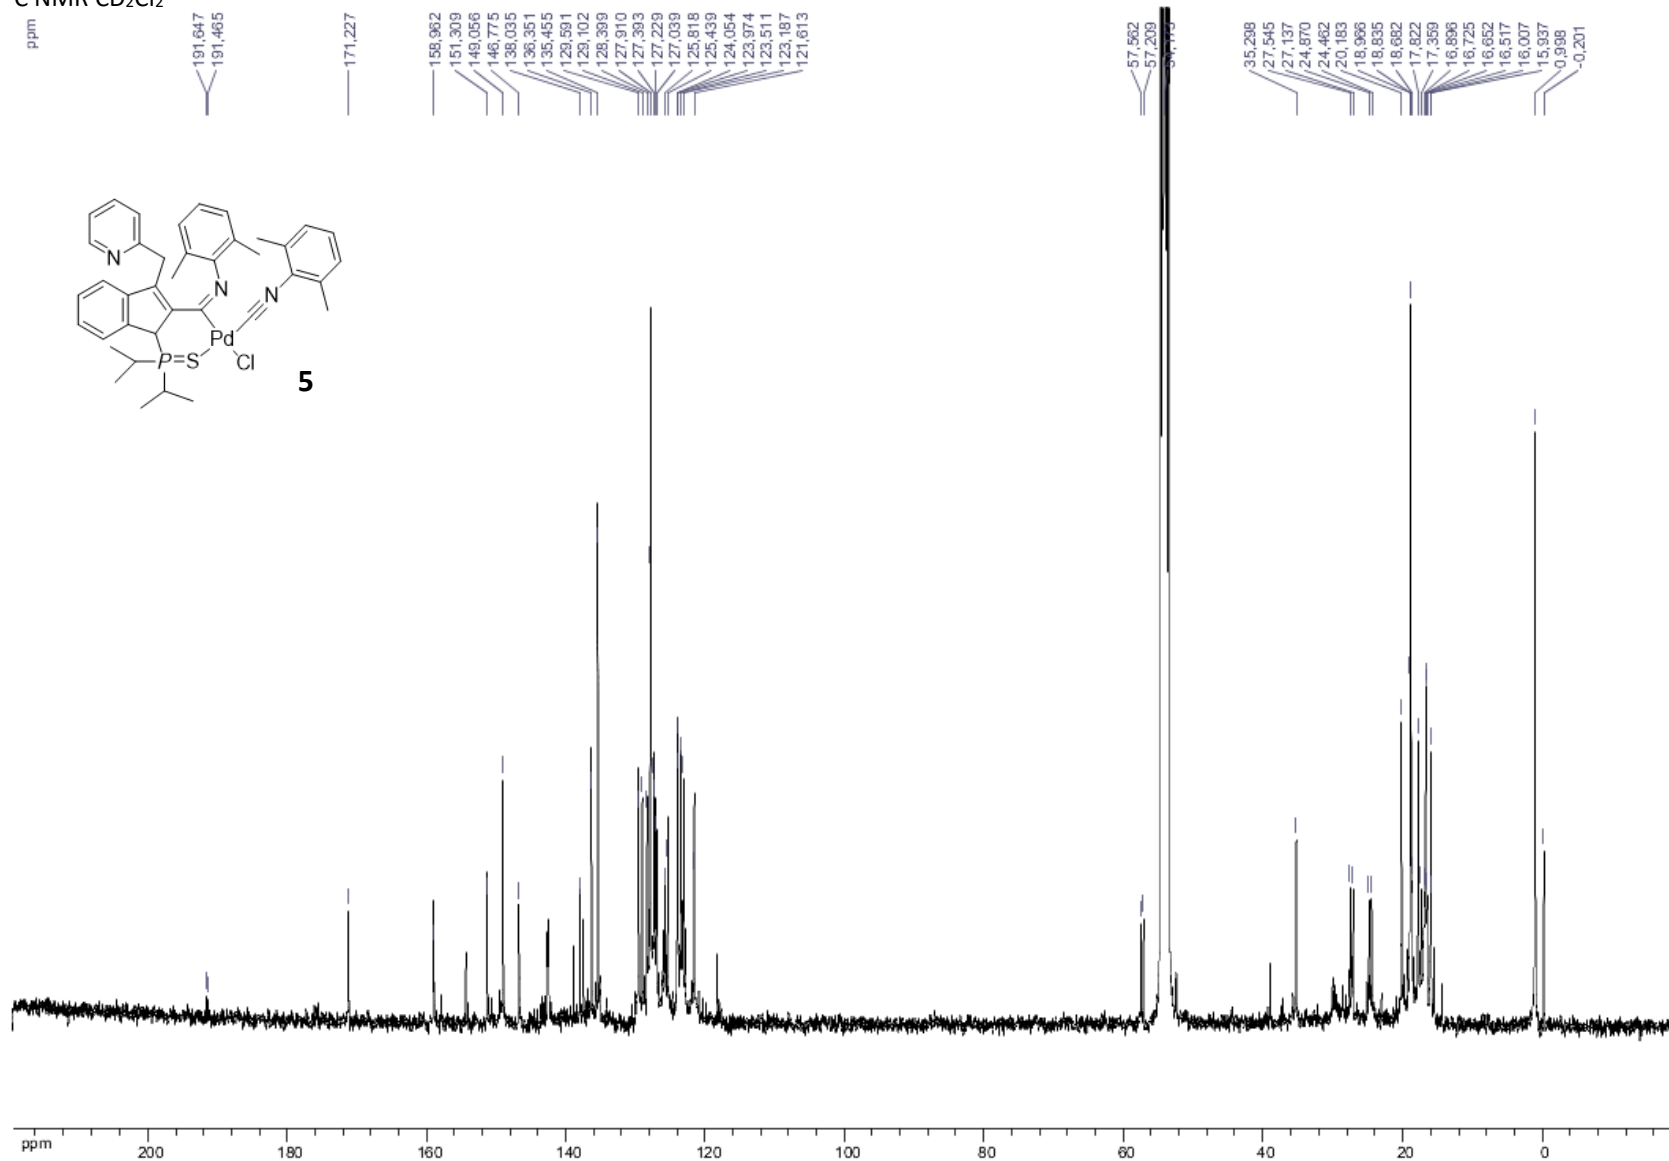

$^{31}\text{P}\{^1\text{H}\}$  NMR  $\text{CD}_2\text{Cl}_2$

ppm

71.805

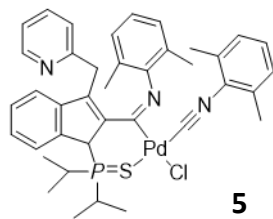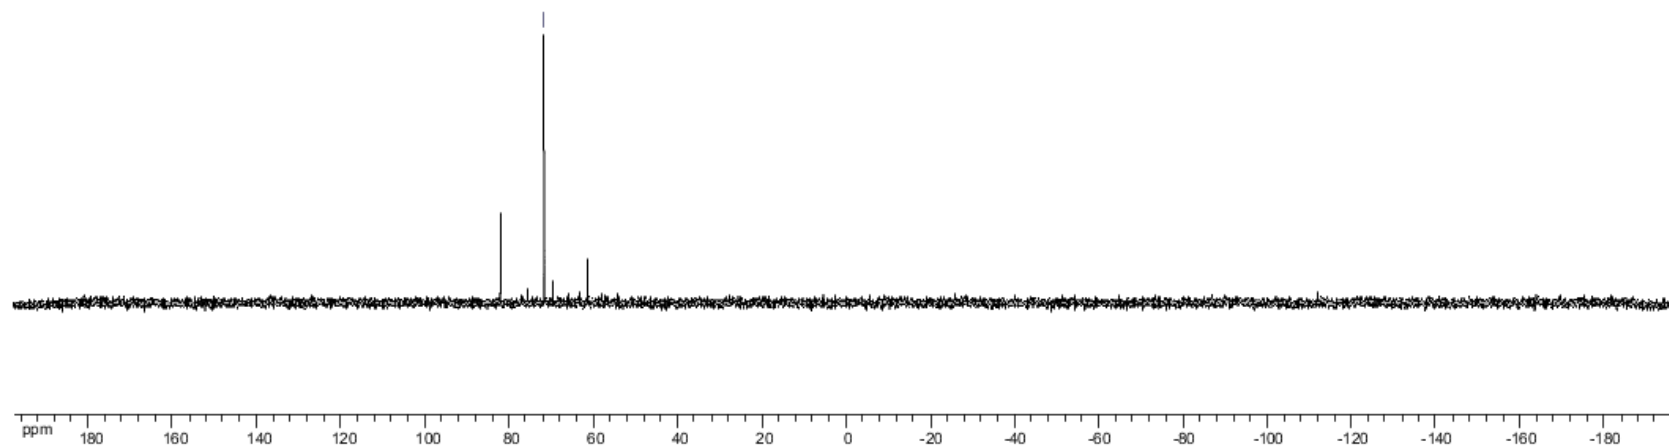

$^1\text{H}$  NMR in  $\text{CD}_2\text{Cl}_2$ 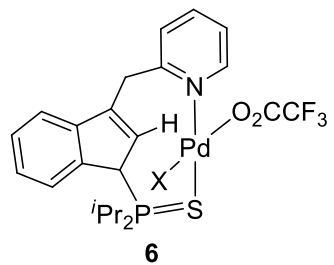
$$X = \text{Cl or CF}_3\text{CO}_2$$
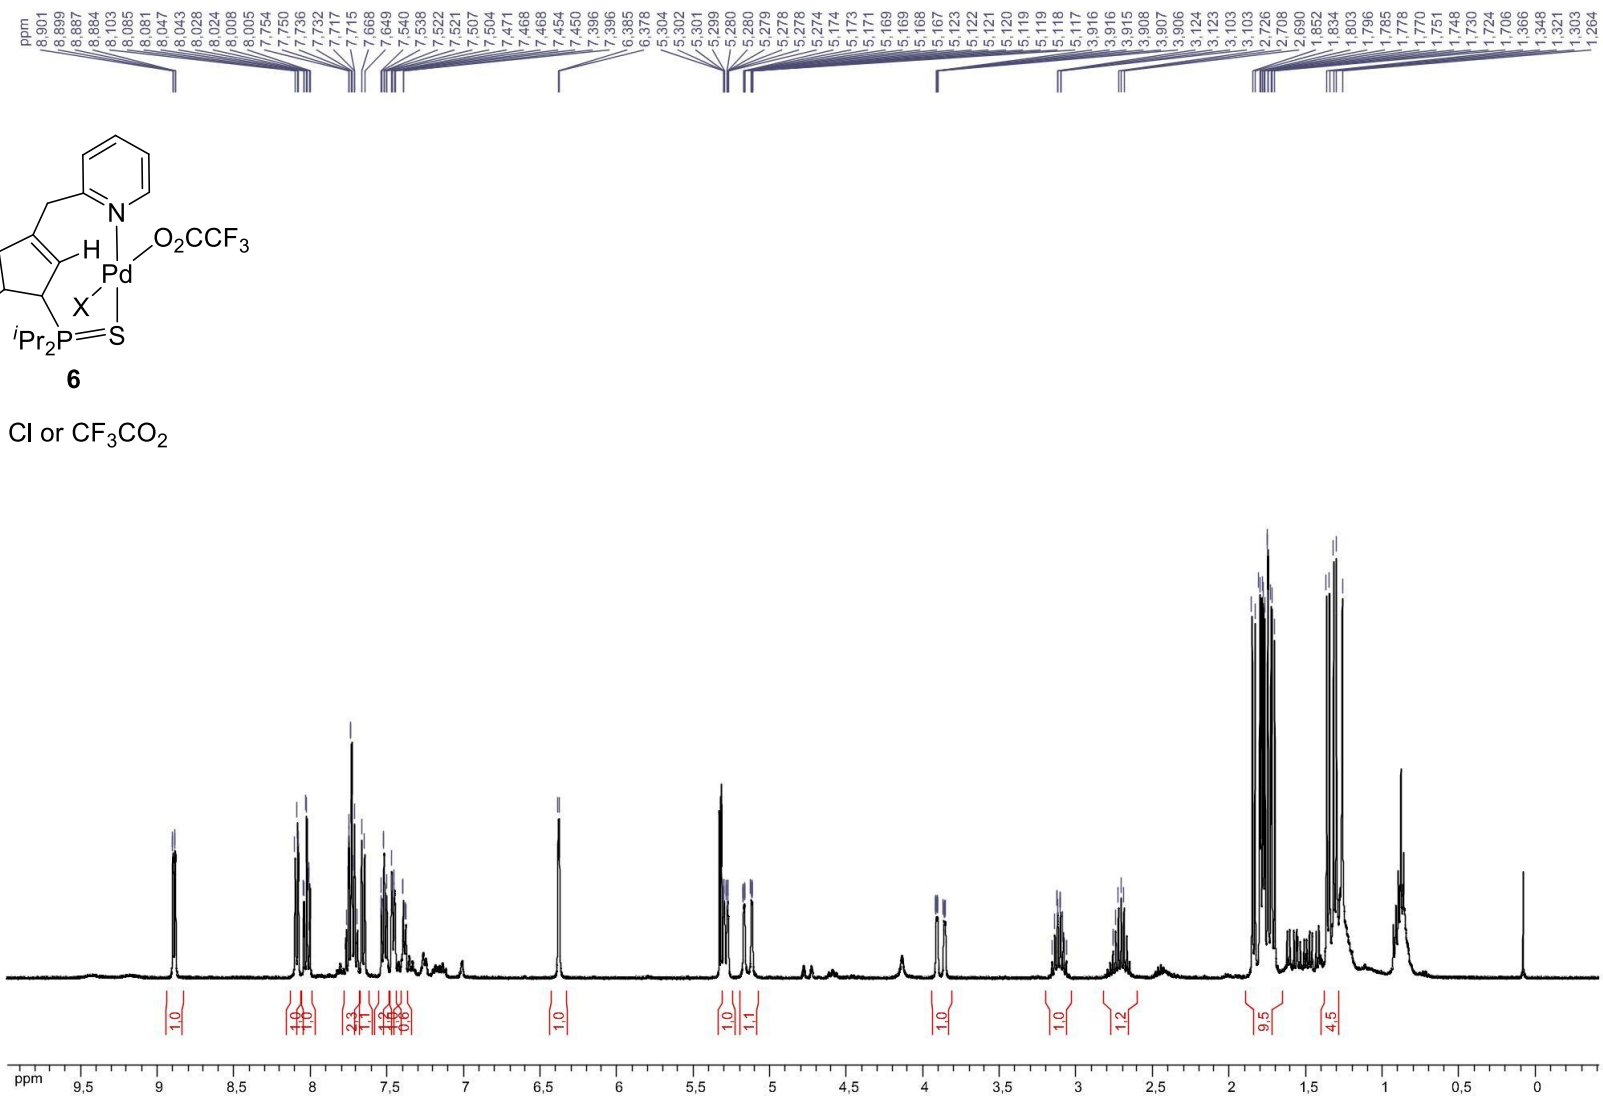

$^{31}\text{P}$  NMR in  $\text{CD}_2\text{Cl}_2$

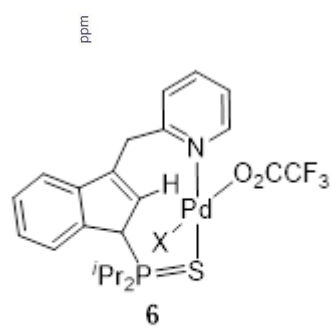

$\text{X} = \text{Cl}$  or  $\text{CF}_3\text{CO}_2$

86.266

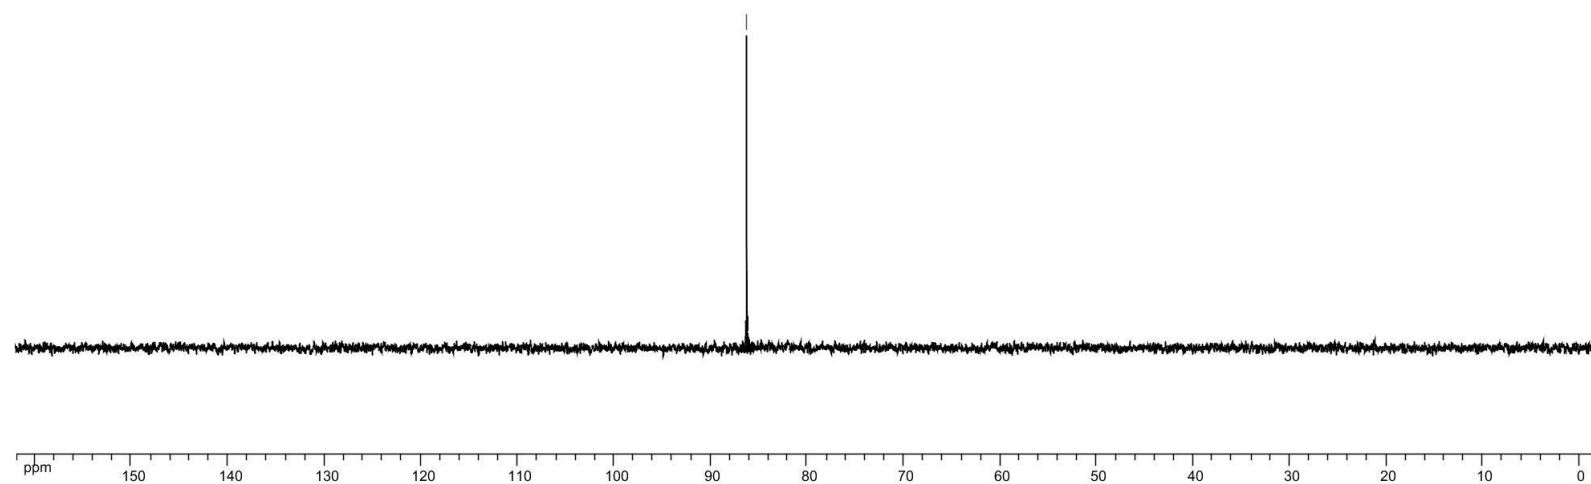

$^{13}\text{C}$  NMR in  $\text{CD}_2\text{Cl}_2$

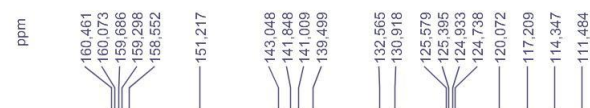

93.715

49.709

40.194

31.045  
30.365

20.042  
18.744  
18.723  
16.051

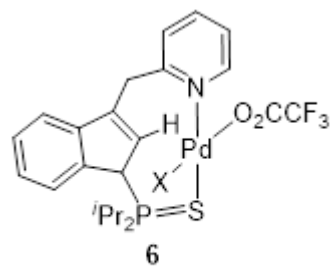

X = Cl or  $\text{CF}_3\text{CO}_2$

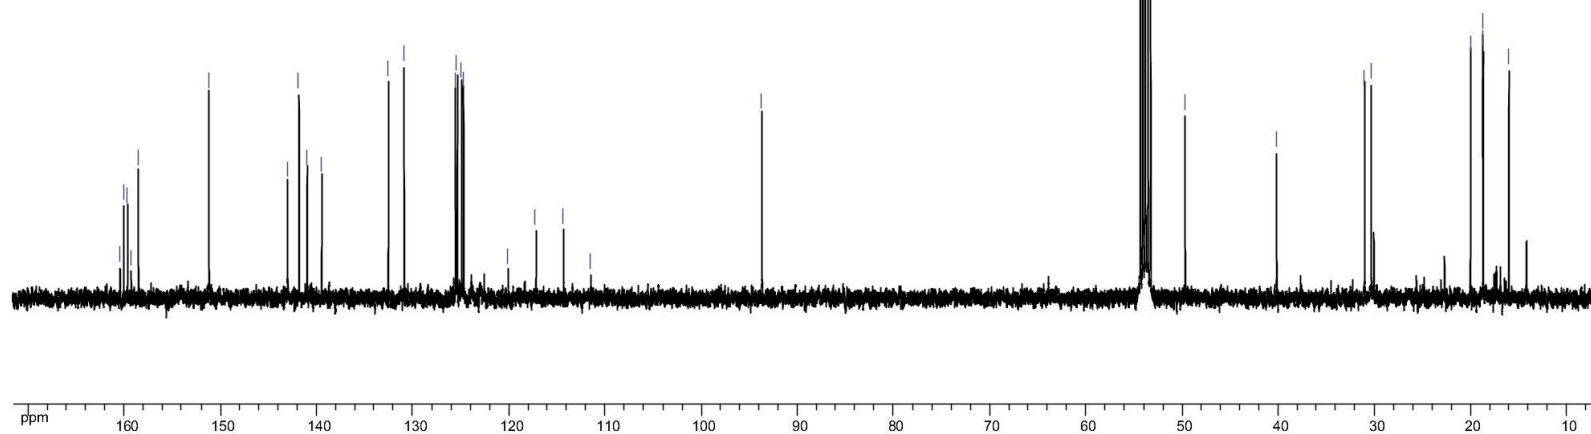

Supplement: c9dt00898e1.pdf [file c9dt00898e1.pdf]
